RESEARCH ARTICLE

# Genomic comparison between *Staphylococcus aureus* GN strains clinically isolated from a familial infection case: IS1272 transposition through a novel inverted repeat-replacing mechanism

Tsai-Wen Wan<sup>1,2</sup>, Wataru Higuchi<sup>3</sup>, Olga E. Khokhlova<sup>1,3,4</sup>, Wei-Chun Hung<sup>3,5</sup>, Yasuhisa Iwao<sup>1,3</sup>, Masataka Wakayama<sup>6</sup>, Noriyoshi Inomata<sup>7</sup>, Tomomi Takano<sup>3</sup>, Yu-Tzu Lin<sup>1,2</sup>, Olga V. Peryanova<sup>4</sup>, Kenji K. Kojima<sup>8,9</sup>, Alla B. Salmina<sup>10</sup>, Lee-Jene Teng<sup>2</sup>, Tatsuo Yamamoto<sup>1,3,4\*</sup>

**1** Department of Epidemiology, Genomics, and Evolution, International Medical Education and Research Center, Niigata, Japan, **2** Department of Clinical Laboratory Sciences and Medical Biotechnology, National Taiwan University College of Medicine, Taipei, Taiwan, **3** Division of Bacteriology, Department of Infectious Disease Control and International Medicine, Niigata University Graduate School of Medical and Dental Sciences, Niigata, Japan, **4** Russia-Japan Center of Microbiology, Metagenomics and Infectious Diseases, Krasnoyarsk State Medical University named after Prof. V.F. Voyno-Yasenetsky, Krasnoyarsk, Russia, **5** Department of Microbiology and Immunology, Kaohsiung Medical University, Kaohsiung, Taiwan, **6** Division of Clinical Laboratory, Kido Hospital, Niigata, Japan, **7** Division of Dermatology, Kido Hospital, Niigata, Japan, **8** Department of Life Science, National Cheng Kung University, Tainan, Taiwan, **9** Genetic Information Research Institute (GIRI), Mountain View, CA, United States of America, **10** Research Institute of Molecular Medicine and Pathobiochemistry, Krasnoyarsk State Medical University named after Professor V. F. Voyno-Yasenetsky, Krasnoyarsk, Russia

\* [tatsuoy@imerc.jp](mailto:tatsuoy@imerc.jp)

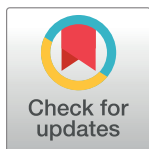

**OPEN ACCESS**

**Citation:** Wan T-W, Higuchi W, Khokhlova OE, Hung W-C, Iwao Y, Wakayama M, et al. (2017) Genomic comparison between *Staphylococcus aureus* GN strains clinically isolated from a familial infection case: IS1272 transposition through a novel inverted repeat-replacing mechanism. PLoS ONE 12(11): e0187288. <https://doi.org/10.1371/journal.pone.0187288>

**Editor:** Bok-Luel Lee, Pusan National University, REPUBLIC OF KOREA

**Received:** February 7, 2017

**Accepted:** October 17, 2017

**Published:** November 8, 2017

**Copyright:** © 2017 Wan et al. This is an open access article distributed under the terms of the [Creative Commons Attribution License](https://creativecommons.org/licenses/by/4.0/), which permits unrestricted use, distribution, and reproduction in any medium, provided the original author and source are credited.

**Data Availability Statement:** The sequence of GN3 genome (GenBank accession no. AP017891), GN1 genome (GenBank accession no. AP018349). These are also available from the DDBJ getentry <http://getentry.ddbj.nig.ac.jp/top-j.html>. PVL phage of GN3 (GenBank accession no. LC086375), and PVL phage of GN1 (GenBank accession no. LC086374) are available from NCBI.

## Abstract

A bacterial insertion sequence (IS) is a mobile DNA sequence carrying only the transposase gene (*tnp*) that acts as a mutator to disrupt genes, alter gene expressions, and cause genomic rearrangements. “Canonical” ISs have historically been characterized by their terminal inverted repeats (IRs), which may form a stem-loop structure, and duplications of a short (non-IR) target sequence at both ends, called target site duplications (TSDs). The IS distributions and virulence potentials of *Staphylococcus aureus* genomes in familial infection cases are unclear. Here, we determined the complete circular genome sequences of familial strains from a Panton-Valentine leukocidin (PVL)-positive ST50/*agr4* *S. aureus* (GN) infection of a 4-year old boy with skin abscesses. The genomes of the patient strain (GN1) and parent strain (GN3) were rich for “canonical” IS1272 with terminal IRs, both having 13 commonly-existing copies (ce-IS1272). Moreover, GN1 had a newly-inserted IS1272 (ni-IS1272) on the PVL-converting prophage, while GN3 had two copies of ni-IS1272 within the DNA helicase gene and near *rot*. The GN3 genome also had a small deletion. The targets of ni-IS1272 transposition were IR structures, in contrast with previous “canonical” ISs. There were no TSDs. Based on a database search, the targets for ce-IS1272 were IRs or “non-IRs”. IS1272 included a larger structure with tandem duplications of the left (IR<sub>L</sub>) side sequence; *tnp* included minor cases of a long fusion form and truncated form. One ce-

**Funding:** This study was supported mainly by personal (TY) money including that obtained from lectures at universities and colleges. This study was also supported partly by reagents and other research materials used in routine research works for Ph. D students (TWW, WH, YI, TT, and YTL) in National Taiwan University College of Medicine and Niigata University Graduate School of Medical and Dental Sciences and for staffs (OEK, WCH, OVP, KKK, ABS, and LJT) in Krasnoyarsk State Medical University, Kaohsiung Medical University, and National Cheng Kung University, and by routine clinical works for staffs (MW and NI) in Kido Hospital. There was no specific funding during this study and authors did not receive a salary for this specific study.

**Competing interests:** The authors have declared that no competing interests exist.

IS1272 was associated with the segments responsible for immune evasion and drug resistance. Regarding virulence, GN1 expressed cytolytic peptides (phenol-soluble modulins  $\alpha$  and  $\delta$ -hemolysin) and PVL more strongly than some other familial strains. These results suggest that IS1272 transposes through an IR-replacing mechanism, with an irreversible process unlike that of “canonical” transpositions, resulting in genomic variations, and that, among the familial strains, the patient strain has strong virulence potential based on community-associated virulence factors.

## Introduction

*Staphylococcus aureus* is a common human pathogen that colonizes the nasal mucosa and skin and causes a wide spectrum of diseases, including skin and soft tissue infections (SSTIs) such as furuncles and cellulitis, systemic infections including bacteremia, sepsis, osteomyelitis, bacteremic pneumonia, and endocarditis, and exotoxin-related diseases such as toxic shock syndrome and food poisoning [1–5]. Most community-associated infections of *S. aureus* in the United States are those that affect skin and soft tissues [4]. *S. aureus* also poses a threat because many of its strains are drug-resistant, most notably methicillin-resistant *S. aureus* (MRSA) with staphylococcal cassette chromosome *mec* (SCC*mec*) [6], which emerged as healthcare-associated MRSA (HA-MRSA) in the early 1960s and as community-associated MRSA (CA-MRSA) in the late 1990s [7–10].

*S. aureus*, both methicillin-susceptible *S. aureus* (MSSA) and CA-MRSA, often produce Pantone-Valentine leukocidin (PVL), which is associated with pyogenic skin infections (large abscesses) [11–13]. PVL is cytotoxic against human polymorphonuclear neutrophils (PMN) and monocytes [14,15] and is encoded by a phage [16]. PVL also acts as a spread factor [9,12,17], with PVL-positive *S. aureus* and CA-MRSA often causing infections among family members through skin-to-skin contact [9,17,18]. The strong expression of peptide cytolytins, such as phenol-soluble modulins (PSMs) and  $\delta$ -hemolysin (Hld), is also associated with CA-MRSA [12,19–22] and CA-MSSA [20,22].

Bacterial chromosomes typically have mobile DNA [23]. *S. aureus* mainly achieves its dynamic evolution through the action of mobile genetic elements, including insertion sequences (ISs), transposons (Tns), plasmids, phages, and *S. aureus* pathogenicity islands [6,23–27]. ISs are generally phenotypically cryptic and only carry the transposase gene (*tnp*), which is necessary for its intracellular transposition [23,28]. However, ISs occasionally exist as multiple copies in a cell [23,28,29]; they often act as mutators and play a role in large chromosomal rearrangements [23,29], the regulation of gene expression [23,26], homologous recombination [23,29], and gene deletion/disruption [23,29,30]. Historically, “canonical” ISs or Tns have been characterized by their terminal inverted repeats (IRs), which may form a stem-loop structure, and flanking target site duplications (TSDs) at both ends, which are generated upon transposition [23,28].

There are more than 4,500 different ISs (Isfinder, <https://www-is.biotoul.fr/index.php>). ISs have been divided into two major types based on transposases, specifically DDE and HUH enzymes, which catalyze the breaking and re-joining of DNA during insertion/transposition [23,28]. The common feature of DDE-type ISs (and Tns) is possessing terminal IRs, which serve as the binding site of DDE transposase [23,28]. DDE-type ISs (and Tns) include subtypes that utilize different intermediate formation mechanisms [28]. For example, IS6 and Tn3 have flanking direct repeats (TSDs) originating from the short target sites of 8 bp [31] and 5 bp [32], respectively, which were created through cointegrate formation (or target-primed transposon replication) [28]. Furthermore, IS630 targets a 5'-NTAN sequence and achieves insertion in a

cut-and-paste manner [28]. Previously identified target sequences are all non-IR sequences, and no IR targets have yet been identified.

IS1272 was initially described in *S. haemolyticus*; it is 1,934 bp in size with 16-bp terminal IRs (sequence identity, 15 of 16 bp), lacks flanking TSDs, and contains two open reading frames (*orfs*): *orf1* and *orf2* [33]. Nosocomial isolates of *S. haemolyticus* are rich in IS1272 copies, suggesting the potential role of IS1272 in bacterial virulence [34]; however, whole-genomic and virulence information are currently lacking to confirm this. The initial IS1272 study [33] also showed that *S. aureus* contains IS1272, but these sequences are mostly incomplete fragments of IS1272, suggesting that IS1272 originally resided in *S. haemolyticus* and that MRSA has more IS1272-hybridizing fragments than MSSA. The MRSA type IV SCC*mec* (SCC*mec*IV) possesses the *mecA*- $\Delta$ *mecR1*- $\Delta$ IS1272 region [6]. In addition, the highly successful HA-MRSA, MRSA252 [35], carries nine copies of IS1272 on its genome (GenBank accession number NC\_002952). However, IS1272 may not be common in MRSA; for example, USA300 (GenBank accession number PC000255; strain FPR3757), a successful PVL-positive CA-MRSA associated with large outbreaks, including serious invasive infections, in the United States in 2007 [7,36], has no copies of IS1272 in its genome, whereas SCC*mec*IVa in USA300 carries a truncated IS1272, as described above. The PVL phages, including that of USA300 [36], generally do not have any copies of IS1272 in their genomes (GenBank accession numbers PC000255).

During the course of a study on the PVL S/F genes and predicted PVL S/F amino acid sequences [37,38], we determined the sequences of not only the entire PVL gene but also of its upstream and downstream regions in clinical *S. aureus* isolates by PCR and sequencing. We detected an IS1272 transposition onto the PVL-converting prophage and proposed the idea of a unique “stem-loop replacing” mode of transposition, in which a target “stem-loop” structure is replaced by that of IS1272 [39] (GenBank accession numbers AB256036-39). In the present study, we elucidated the sequences of the complete circular genomes using the patient strain (GN1) and parent strain (GN3), clinically isolated from a family infection case caused by a single clone of PVL-positive ST50 community-associated *S. aureus* (GN), and we performed a comprehensive comparison between the GN1 and GN3 genomes. This evaluation focused on the status of multiple IS1272 copies in the *S. aureus* genomes, including newly-inserted IS1272 (ni-IS1272); we unambiguously revealed that the targets of transposition for IS1272 were IR sequences (with different sequences and sizes), in contrast with the targets of previously described ISs (“canonical” or not). For commonly-existing IS1272 (ce-IS1272) in GN1 and GN3, we searched the target site sequences using a database of previously reported genome sequences. In light of our results, we discuss, particularly from the viewpoint of basic science, potential mechanisms that could be responsible for IS1272 transposition, given that IS1272 generates a deletion of its target “stem-loop” structure.

In previous molecular epidemiology studies of clinical *S. aureus* infections, one clonal infection of *S. aureus* lineage was verified, for example, by pulsed-field gel electrophoresis (PFGE) analysis of the genomes [17,40]; however, the whole genomes of *S. aureus* in this type of familial infection case have not been elucidated sufficiently, particularly in terms of the IS transposition and virulence potential. Therefore, in the present study, we analyzed variations among the GN genomes as well as virulence potential differences among GN familial strains, particularly for community-associated factors, peptide cytolysins and PVL.

## Materials and methods

### Ethics statement

The Ethics Review Board of Niigata University School of Medicine, Niigata, Japan (Ethics Review Board No. 748) specifically approved this study. Written informed consent was obtained from patients, where necessary.

### A patient, familial infections, and bacterial strains

A 4-year-old boy was brought to a hospital (Kido Hospital, Niigata) on July 23, 2005. Large skin abscesses (furuncles) were observed in his gluteal region. PVL-positive CA-MSSA was isolated from pus; this strain was designated GN1. The epidemiological definition of CA-*S. aureus* was based on the Centers for Disease Control and Prevention (CDC) criteria for CA-MRSA and HA-MRSA [7]. A 10% zinc oxide ointment sheet was placed on the furuncle region, and the patient was orally administered clarithromycin at 100 mg/day. The patient had frequently developed SSTIs including skin abscesses between 2003 and 2004. Nasal swabs were obtained in 2005 from eight of the patient's family members (from three families) who were living together with the boy within the same house to examine familial infections (Fig 1A). PVL-

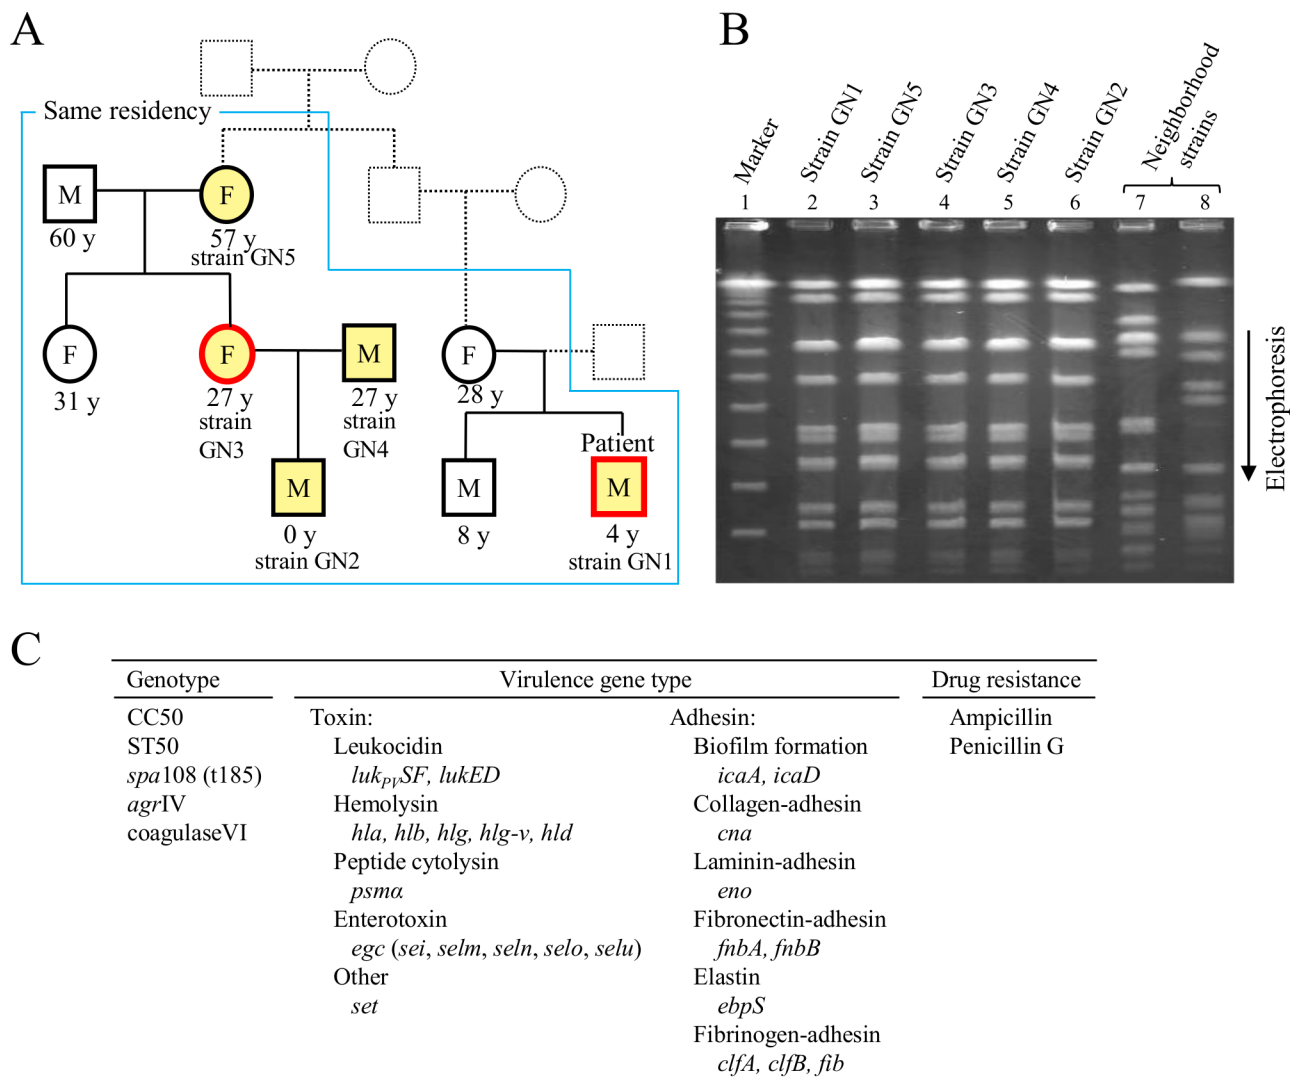

**Fig 1. Intrafamilial transmission and molecular characteristics of Pantone-Valentine leukocidin (PVL)-positive *Staphylococcus aureus*.** (A) Nine family members (from three families) were living together with the 4-year-old boy (a patient who had skin abscesses) within the same house. Five members who were infected with PVL-positive *S. aureus* are marked with yellow. Four members, except the 4-year-old patient, did not develop any symptoms. Red square and circle indicate that the genomes of PVL-positive *S. aureus* were sequenced. PVL-positive *S. aureus* strains: GN1, patient strain; GN2, infant strain; GN3, 27-year-old parent (female) strain; GN4, 27-year-old parent (male) strain; GN5, strain from the oldest member among infected members. (B) Familial strains (GN1 to GN5) were analyzed by pulsed-field gel electrophoresis, suggesting a clonal infection from one PVL-positive *S. aureus* source. Neighborhood strains were from healthy persons from neighboring families unrelated to the patient's families. (C) The genotypes, virulence genes analyzed by PCR, and drug resistance of familial strains GN1 to GN5 are summarized, indicating the common features among strains GN1 to GN5.

<https://doi.org/10.1371/journal.pone.0187288.g001>

positive MSSA was isolated from four out of the eight family members; therefore, a total of five out of the nine members (including the patient) were positive for PVL-positive MSSA, and their ages ranged from 0–60 years with a mean age of 26.9 years. Except for the 4-year-old boy (patient), the infected individuals did not show any symptoms; the PVL-positive MSSA isolated from these individuals were designated GN2 to GN5, as shown in Fig 1A. Two colonies each of GN1 to GN5, developed on initial bacterial isolation agar media, were characterized for *S. aureus* genotypes and drug susceptibilities.

Twenty-nine MSSA and two MRSA strains were also isolated from the nasal swabs of 78 healthy neighbors (including children) from 21 families (unrelated to the patient family); they were all PVL-negative.

## Genotyping and virulence gene analysis

Multi-locus sequence typing (MLST) was performed as described previously [21,41]; the ST type was obtained from the MLST website (<http://www.mlst.net/>). The *spa* (protein A gene) type was analyzed by PCR and elucidated using the public *spa* type databases eGenomics (<http://tools.egenomics.com/>) and Ridom SpaServer (<http://spaserver.ridom.de/>). The accessory gene regulator (*agr*) allele group was assessed by performing PCR with previously reported primers [39,40]. Coagulase typing was conducted using a staphylococcal coagulase antiserum kit (Denka Seiken, Tokyo, Japan), according to the manufacturer's instructions. An analysis of virulence genes was performed based on PCR results [21,29,41]. This analysis included 48 virulence genes: 3 leukocidin genes (*luk<sub>PV</sub>SF*, *lukE-lukD*, and *lukM*), 5 hemolysin genes (*hla*, *hly*, *hlg*, *hlg-v*, and *hld*), the peptide cytolysin (PSM $\alpha$ ) gene (*psm $\alpha$* ), 19 staphylococcal superantigen (SAg) genes, named enterotoxin (SE) or enterotoxin-like (SEI) genes (*tst*, *sea-e*, *seg-j*, *selk-r*, and *selu*), staphylococcal exotoxin (*set*) genes, a staphylococcal superantigen-like gene cluster (*ssl*), 3 exfoliative toxin genes (*eta/b* and *etd*), the epidermal cell differentiation inhibitor gene (*edin*), and 14 adhesin genes (*icaA/D*, *eno*, *fib*, *fnbA/B*, *ebpS*, *clfA/B*, *sdrC-E*, *cna*, and *bbp*).

## Susceptibility testing

Susceptibility testing of bacterial strains was performed using the agar dilution method with Muller-Hinton agar according to previously described procedures [42]. Thirty-nine antimicrobial agents were tested, including 15  $\beta$ -lactams, 4 aminoglycosides, 3 tetracyclines, 3 macrolides, 3 fluoroquinolones, and 2 glycopeptides, as well as linezolid, clindamycin, trimethoprim, sulfamethoxazole, chloramphenicol, fosfomycin, mupirocin, rifampicin, and fucidic acid. Breakpoints for drug resistance were those described by the Clinical and Laboratory Standards Institute (CLSI) [42].

## PFGE analysis

Bacterial DNA was digested with *Sma*I, and digested DNA was applied to PFGE (1.2% agarose), as described previously [17,21,29,40]. A lambda ladder (Bio-Rad Laboratories, Tokyo, Japan) was used as the molecular size standard (marker).

## Genome analysis

The PVL prophage genomes and bacterial genomes of GN1 and GN3 (patient and mother strains, respectively, Fig 1A) were analyzed. The entire genome sequences of the PVL prophages contained by GN1 and GN3, named  $\phi$ PVL-Sa2<sub>GN1</sub> and  $\phi$ PVL-Sa2<sub>GN3</sub>, respectively, were determined by PCR and sequencing; the genome sizes were 48,010 bp and 46,089 bp,



respectively, and the GenBank accession numbers are LC086374 and LC086375, respectively. The bacterial genome sequences of GN1 and GN3 were analyzed by a long-read single-molecule real-time (SMRT) sequencing platform with P5/C3 chemistry using sequencing technology and the PacBio RS II system (Pacific Biosciences, Menlo Park, CA, USA) with the assembler software SMRT Analysis v2.3.0/hierarchical genome-assembly process (HGAP) pipeline [43]. Genome coverage (sequencing depth) was 563-fold and 443-fold of each genome size for GN1 and GN3, respectively. Completion of the genome contig to construct the full circular genome sequence was performed by PCR and sequencing. For the GN1 and GN3 bacterial genomes, the sizes were 2,809,565 bp and 2,809,401 bp, respectively (Fig 2), and the GenBank accession numbers are AP018349 and AP017891, respectively.

### PCR analysis of IS1272 insertions in the PVL prophage region of familial strains

Nine PCR primer sets (A to C and 1 to 6) were used to investigate the presence of an IS1272 insertion at a region located downstream of the PVL S/F genes (*luk<sub>PV</sub>SF*) on the PVL prophage DNA; primer sequences are summarized in S1 Fig [37,44]. PCR primers, PVL-1 and NPVL-2, were based on reference [44]. Other PCR primers were initially designed based on the DNA sequence of a PVL prophage lacking an IS1272 insertion that was carried by the ST30 CA-MRSA strain NN1 [37]; later primers were designed based on the sequences of  $\phi$ PVL-Sa2<sub>GN1</sub> and  $\phi$ PVL-Sa2<sub>GN3</sub>. The primers for IS1272 were designed based on the  $\phi$ PVL-Sa2<sub>GN1</sub> sequence, which has an IS1272 insertion. Of the three primer sets (A to C), primer set B detects the terminal IRs of the target sequence of IS1272; thus, in the present study, GN1, GN2, and GN5 (in which the target was replaced by IS1272) each produced negative results in PCR assays using primer set B. Of the other six PCR primer sets (1 to 6), primer set 1 detects the PVL S gene and also its upstream region (thus, in the present study, GN1 to GN5 each gave PCR products of the same size, indicating no IS1272 insertion); primer sets 2–5 each detect an IS1272 inserted downstream of the PVL S/F genes (thus, in the present study, GN1, GN2, and GN5 each produced positive results); and primer set 6 detects the 3'-end region of the PVL F gene and a region located downstream of the PVL F gene (thus, in the present study, GN1 to GN5 all yielded PCR products, but GN1, GN2, and GN5 each produced ca. 2-kb bigger PCR products, due to the presence of an IS1272 insertion).

### mRNA expression assay

*S. aureus* strains were cultured on 5% sheep blood agar (Becton Dickinson, Tokyo, Japan) for 8 h at 37°C. The mRNA expression levels of the *psmA*,  $\delta$ -hemolysin (*hld*), PVL (*luk<sub>PV</sub>SF*), and 16S rRNA genes were then examined using an RT-PCR assay [20–22]. The *psmA* *hld*, and *luk<sub>PV</sub>SF* expression levels were then normalized to 16S rRNA expression levels. ST5/SCCmecII HA-MRSA strains (Mu50 and N315) were used as low *psmA* *hld* expression control strains, and the ST8/SCCmecIVa PVL<sup>+</sup> CA-MRSA type strain USA300-0114, ST30/SCCmecIVc PVL<sup>+</sup> CA-MRSA strain RS08, and ST121/*agr4* CA-MSSA strain KT1 were used as stronger *psmA*/*hld* expression control strains [20–22]. Experiments were repeated six times for each strain.

### PVL assay

*S. aureus* strains were cultured in brain heart infusion (BHI) broth (Becton Dickinson, Sparks, MD, USA) with or without of 5% fetal bovine serum (Gibco, Carlsbad, CA, USA) for 18 h at 37°C; resultant cultures were adjusted to an optical density of 600 nm (OD<sub>600</sub>) of approximately 0.7 (at 10-fold dilutions). Serial doubling dilutions of the culture supernatants were made, and the amounts of PVL in the supernatants of bacterial cultures were examined using a

A

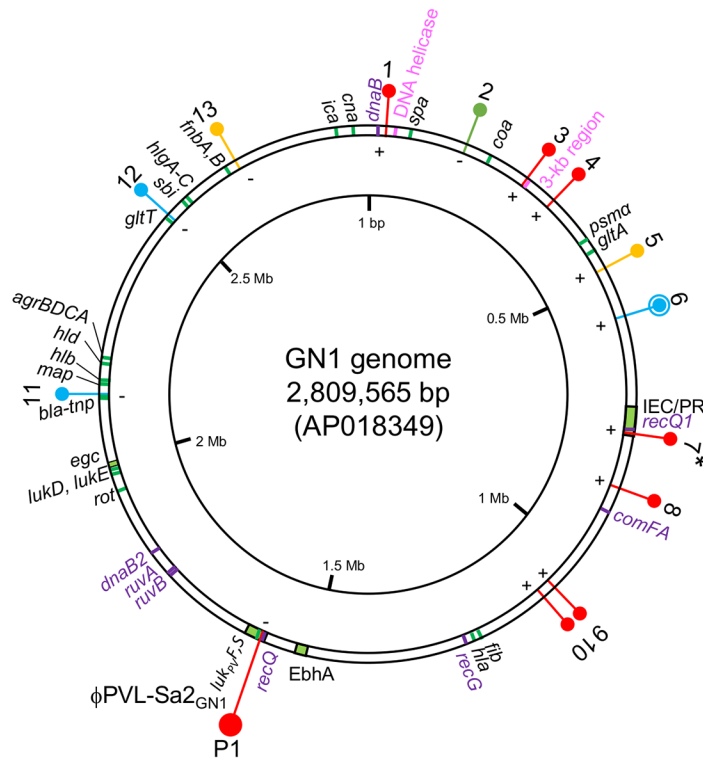

| IS1272           |             |
|------------------|-------------|
| Types of IS1272: |             |
| ●                | : ni-IS1272 |
| ● ● ● ●          | : ce-IS1272 |
| ● ●              | : IS1272L   |
| Targets:         |             |
| ●                | : IRs       |
| ●                | : "Non-IRs" |
| ● ●              | : Targets ? |

B

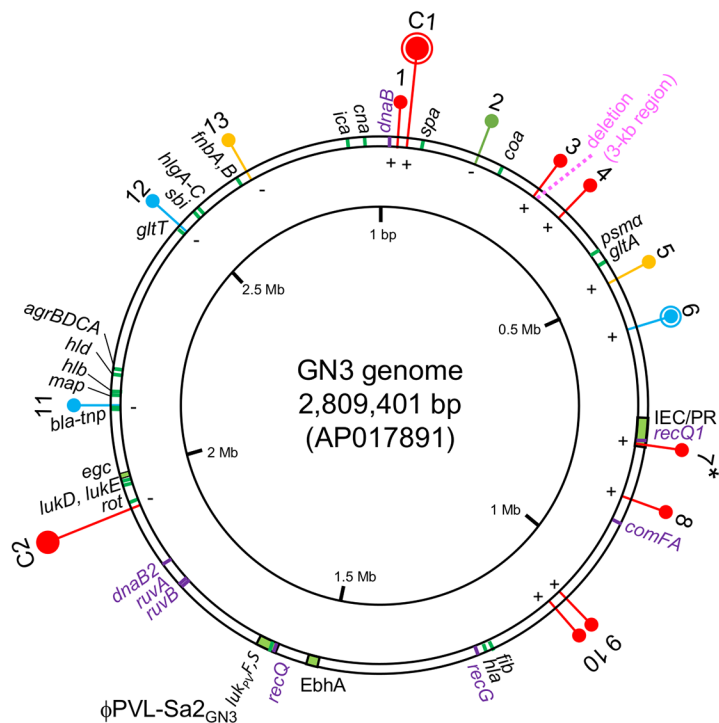

**Fig 2. Circular genome maps of familial strains GN1 and GN3.** Genomes: A, GN1; B, GN3. Genome information includes *S. aureus*-typing targets, phages, mobile genetic elements, including IS1272, deletion, virulence, and drug resistance. Genes (products) described on the genome map are: *spa*, protein A (IgG-binding protein); *coa*, coagulase; *psmA*, phenol-soluble modulin  $\alpha$  (PSM $\alpha$ , cytolytic peptide); *gltA*, glutamate synthase; *fib*, fibrinogen adhesin; *hla*,  $\alpha$ -hemolysin (Hla); *ebhA*, extracellular matrix-binding protein/very large surface-anchored protein/giant protein (Ebh); *rot*, repressor of toxins; *lukE-lukD*, bi-component leukocidin; *egc*, enterotoxin gene cluster carrying *sei*, *selm*, *seln*, *selo*, and *selu*; *map*, map protein; *hlyB*,  $\beta$ -hemolysin (HlyB); *hlyD*,  $\delta$ -hemolysin (HlyD, cytolytic peptide); *agr*, accessory gene regulator; *gltT*,

proton/sodium-glutamate symport protein, *sbi*, second binding protein of immunoglobulin, *hlg*,  $\gamma$ -hemolysin (Hlg); *fnb*, fibronectin-binding protein; *ica*, intercellular adhesion protein A (biofilm formation); *cna*, collagen adhesin. The DNA helicase gene and eight other helicase genes, *dnaB*, *recQ1*, *comFA*, *recG*, *recQ*, *ruvB*, *rubA*, and *dnaB2*, were also mapped on the genomes; they are shown in purple. GN1 and GN3 had PVL-converting  $\phi$ Sa2 ( $\phi$ PVL-Sa2<sub>GN1</sub> and  $\phi$ PVL-Sa2<sub>GN3</sub>, respectively), carrying the PVL genes (*luk<sub>PV</sub>SF*). Unique genetic structures were carried by  $\phi$ Sa3 remnant, the immune evasion cluster (IEC), composed of three immune evasion genes, *sak* (staphylokinase, SAK), *chp* (chemotaxis inhibitory protein of *S. aureus*, CHIPS), and *scn* (staphylococcal complement inhibitor, SCIN), being present on the GN genome as IEC/PR. Penicillin resistance was encoded by a chromosomal *bla-tnp* structure, carrying an array of *blaI-blaR1-blaZ* and *tnpC-tnpB-tnpA*. The GN1 and GN3 genomes carried 14 and 15 copies of IS1272, respectively. Of those, 13 copies were commonly-existing IS1272 (ce-IS1272), and named 1 to 13; moreover, GN1 had one copy of newly-inserted IS1272 (ni-IS1272), which was named P1, while GN2 had two copies of ni-IS1272, which were named C1 and C2, as shown in A and B, respectively. ce-IS1272 copy 6 and ni-IS1272 copy C1 formed a larger structure (designated as IS1272L). ce-IS1272 copy 2, labeled in green, had the transposase gene (*tnp*) encoding for a long fusion form of transposase; ce-IS1272 copy 7, marked with an asterisk, had *tnp* encoding for a truncated form of transposase. The direction of the IS1272 insertion is shown by + or -. The targets of IS1272 transposition are indicated by color: red, IRs; blue, "non-IRs"; yellow and green, unknown (target sequences are too big in size). The 3-kb region, located close to IS1272 copy 3, in GN1 (A) was deleted in GN3 (B).

<https://doi.org/10.1371/journal.pone.0187288.g002>

PVL-RPLA kit (Denka Seiken, Niigata, Japan), according to the instructions of the manufacturer. Experiments were repeated four times for each strain.

### Phylogenetic analysis

Multiple alignments were performed up to 1,000 times using default settings with ClustalW software (version 2.1), and a phylogenetic tree analysis was performed using TreeViewX software (version 0.5.0) (<http://taxonomy.zoology.gla.ac.uk/rod/treeview.html>).

### Analysis of the target sequences of ce-IS1272 transposition

A database composed of previously reported *S. aureus* genomes was searched for target sequences for ce-IS1272 transposition. The analysis of homology between the *S. aureus* genome sequences containing the target sequences of ce-IS1272 transposition and the GN1/GN3 genome sequences carrying ce-IS1272 was performed using the software BLAST (<http://blast.ddbj.nig.ac.jp/top-e.html>).

### PCR analysis of a possible extrachromosomal circular DNA molecule of IS1272

In order to investigate a possible extrachromosomal circular DNA molecule of IS1272, we designed PCR primers, IS1272-0F (5' -AAGACCGAGGCTGAGACG) and IS1272-0R (5' -GGA AAATAGCAGCTCGACG), based on the IS1272 sequences in GN1 and GN3.

### Statistical analysis

Data were evaluated by a Student's *t*-test, a Fisher's exact test, or an analysis of variance with repeated measurements for the mRNA expression assay. The level of significance was defined as a *P* value of <0.05.

## Results

### Familial infection from PVL-positive MSSA

Among the nine members from three families who were living together within the same house, five were positive for PVL-positive CA-MSSA, and the strains isolated from these individuals were named strains GN1 to GN5 (Fig 1A). A PFGE analysis revealed that the five PVL-positive CA-MSSA strains GN1 to GN5 were the same (Fig 1B), indicating the intrafamilial spread



of the single PVL-positive CA-MSSA clone (GN). The PVL-positive CA-MSSA GN (strains GN1 to GN5) belonged to ST50 (CC50), exhibited *spa*108 (t185), *agr*4, and coagulase VI, carried toxin genes such as *luk<sub>PV</sub>SF*, *hld*, *psm $\alpha$*  and *egc* (an enterotoxin gene cluster carrying *sei*, *selm*, *seln*, *selo*, and *selu*, but lacking *seg*), carried 12 adhesin genes including *cna* (encoding for collagen adhesin), and was only resistant to ampicillin/penicillin G (Fig 1C). The above characteristics of GN strains (GN1 to GN5) were confirmed for two initially-isolated colonies of each strain.

Among the five family members infected with GN, only a 4-year-old boy, infected with strain GN1, developed furuncles, whereas the four other members, a <1-year-old infant, 27-year-old female and male parents, and the oldest (57-year-old) infected member (infected with strains GN2, GN3, GN4, and GN5, respectively), did not develop any symptoms.

PVL-positive MSSA was not isolated from the healthy individuals of neighboring families; MSSA (or MRSA) strains isolated from neighboring family members were divergent, as shown in Fig 1B.

### The complete circular genome structures of patient strain GN1 and parent strain GN3

The GN1 and GN3 genomes were estimated to be 2,809,565 bp and 2,809,401 bp, respectively. Based on the GN1 and GN3 complete circular genome sequences, the GN1 and GN3 circular genome maps were constructed, as shown in Fig 2A and 2B, respectively, with a focus on *IS1272*, some virulence genes, some regulatory genes or regulons, genes used for genotyping (*spa*, *agr*, and *coa*), resistance genes, and phages.

Regarding phages, the GN1 and GN3 genomes each carried PVL-converting  $\phi$ Sa2. These phages,  $\phi$ PVL-Sa2<sub>GN1</sub> and  $\phi$ PVL-Sa2<sub>GN3</sub>, were 48,010 bp and 46,089 bp in size, respectively, and showed 85% and 98% homology with the PVL-converting  $\phi$ Sa2 of JCSC7401/ST80 MRSA (S2 Fig). The overall homology between  $\phi$ PVL-Sa2<sub>GN1</sub> and  $\phi$ PVL-Sa2<sub>GN3</sub> was 95.9%. GN1 and GN3 both lacked  $\phi$ Sa3,  $\phi$ Sa5,  $\phi$ Sa6, and  $\phi$ Sa7.

Regarding ISs, 14 and 15 copies of *IS1272* were distributed along the GN1 and GN3 genomes, respectively. In addition to *IS1272*, the GN1 and GN3 genomes carried several other ISs: eight copies of *ISSep3*, designated as *ISSep3* (GN1) or (GN3), and two copies of *ISSep2*, designated as *ISSep2* (GN1) or (GN3), suggesting that *IS1272* was the most prevalent IS in the GN1 and GN3 genomes. GN1 and GN3 did not have any copies of *IS256*, which exists as a multi-copy system in epidemic MRSA [29].

Regarding virulence genes, the immune evasion cluster (IEC), which is generally present on the left-end side of  $\phi$ Sa3 [21,27,29,45], was found in the GN1 and GN3 genomes. IEC (GN1) and IEC (GN3) each carried three immune evasion genes: *sak* for staphylokinase (SAK), *chp* for the chemotaxis inhibitory protein of *S. aureus* (CHIPS), and *scn* for staphylococcal complement inhibitor (SCIN), as well as the  $\phi$ Sa3 remnant. Therefore, the IEC in the GN1 and GN3 genomes was designated as IEC/PR. The location of IEC/PR was not *hnb*, which provides the insertion site (*att*) for  $\phi$ Sa3; IEC/PR was located distant from *hnb*. Thus, the *hnb* in the GN1 and GN3 genomes was intact (Figs 1C, 2A and 2B).

Regarding resistance, three penicillin resistance-related genes, *bla<sub>Z</sub>*, *blaR1*, and *blaI*, which are carried by a penicillinase plasmid in *S. aureus* [46], were present in the GN1 and GN3 genomes.

### Status of multiple *IS1272* copies on the GN1 and GN3 genomes

The *IS1272* copies of GN1 and GN3, *IS1272* (GN1) and *IS1272* (GN3), only carried one transposase gene (*tnp*), unlike *IS1272* (*S. haemolyticus*), which has two *orfs* [33], as shown in Fig 3A [33,47]. The *orf1* sequence of *S. haemolyticus* *IS1272* contains a premature stop codon due to a

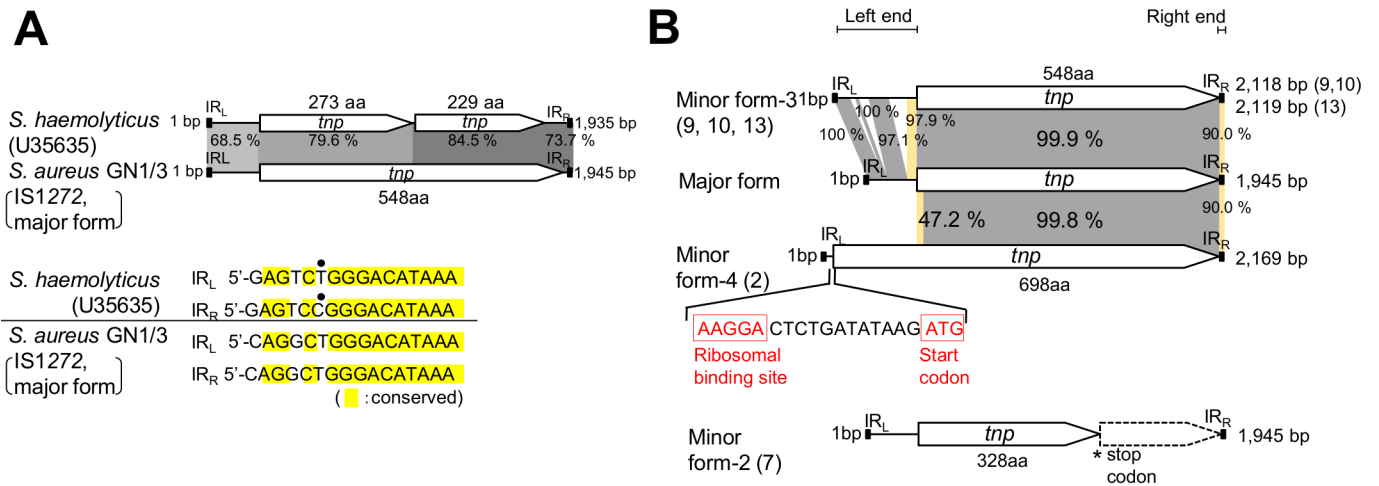

C

| IS1272 sequence/ structure type | IS1272 copies             | tnp       |                                                     | entire size (bp) | Left end                 |           | Right end                                     |                     |    |
|---------------------------------|---------------------------|-----------|-----------------------------------------------------|------------------|--------------------------|-----------|-----------------------------------------------|---------------------|----|
|                                 |                           | size (bp) | mutations nt (aa)                                   |                  | IR <sub>L</sub> sequence | size (bp) | IR <sub>R</sub> sequence (reverse complement) | size (bp)           |    |
| Major form                      | 1, 3-6, 8, 11, C1, C2, P1 | 1647      | -                                                   | 278              | 5'-CAGGCTGGGACATAAA      | 16        | 20                                            | 5'-CAGGCTGGGACATAAA | 16 |
| Minor form-1                    | 12                        | 1647      | 604 A→G (S→G)                                       | 278              | 5'-CAGGCTGGGACATAAA      | 16        | 20                                            | 5'-CAGGCTGGGACATAAA | 16 |
| Minor form-2                    | 7                         | 1647      | 987 T→G (Y→stop codon)                              | 278              | 5'-CAGGCTGGGACATAAA      | 16        | 20                                            | 5'-CAGGCTGGGACATAAA | 16 |
| Minor form-3                    | 9                         | 1647      | 522 A→C (E→D),<br>1556 C→T (V→A),<br>1626 A→T (K→N) | 451              | 5'-CAGGCTGGGACATAAA      | 16        | 20                                            | 5'-GAGGCTGGGACATTAA | 16 |
|                                 | 10                        | 1647      | 522 A→C (E→D),<br>1626 A→T (K→N)                    | 451              | 5'-CAGGCTGGGACATAAA      | 16        | 20                                            | 5'-GAGGCTGGGACATTAA | 16 |
|                                 | 13                        | 1647      | 118 G→A (E→K),<br>1626 A→T (K→N)                    | 452              | 5'-CAGGCTGGGACATAAA      | 16        | 20                                            | 5'-GAGGCTGGGACATTAA | 16 |
| Minor form-4                    | 2                         | 2097      | addition<br>450bp (150aa)                           | 53               | 5'-AGGCTATAAGTTTAAG      | 16        | 19                                            | 5'-AGGCTGGGACATTAAG | 16 |

**Fig 3. Comparison of IS1272 from *S. haemolyticus* and *S. aureus* GN (A), and comparison between IS1272 copies on the GN genomes (B and C).** (A) The IS1272 of *S. haemolyticus* has two transposase (Tnp) genes (ORFs, *tnp*) and heterogeneous IRs (sequence identity, 15 of 16 bp); divergent nucleotides are shown by a dot [33]. In contrast, a major form of IS1272 in GN1 and GN3 had only one *tnp* and homogeneous IRs (sequence identity, 16 of 16 bp). (B) The structures of IS1272, major form and minor forms (2, 3, and 4), were compared. Homologous regions are shaded in each comparison. IS1272/minor form-2 (copy 7) had a premature stop codon in *tnp*, thus its product was predicted to be truncated Tnp. IS1272/minor form-4 (copy 2) had *tnp* of a larger size, which started at an ATG codon located upstream of *tnp*/major form; the ribosome binding sequence (AAGGA), which can potentially pair with the complementary sequence at the 3'-end of 16S rRNA [47], is shown in red. (C) The genetic statuses of 16 IS1272 copies on the GN1/GN3 genomes are summarized. IS1272/major form had 1,647-bp (548-aa) *tnp* and 16-bp homogeneous IRs (sequence identity, 16 of 16 bp). IS1272/minor form-1 had a nonsynonymous substitution in *tnp*. IS1272/minor form-2 had a premature stop codon in *tnp*. IS1272/minor form-3 had 16-bp heterogeneous IRs (sequence identity, 14 of 16 bp) and *tnp* which was divergent in comparison with *tnp*/major form. IS1272/minor form-4 had 16-bp more-divergent IRs (sequence identity, 10 of 16 bp) and *tnp* with a 450-bp (150-aa) longer N-terminal side. nt, nucleotide.

<https://doi.org/10.1371/journal.pone.0187288.g003>

frame shift caused by a one-base deletion, relative to the transposase gene sequences of IS1272 (major form) of GN1 and GN3. Regarding the 16-bp terminal IR sequences, IS1272 (*S. haemolyticus*) and IS1272-major form (GN1, GN3) were divergent by two nucleotides. The IR<sub>L</sub> and

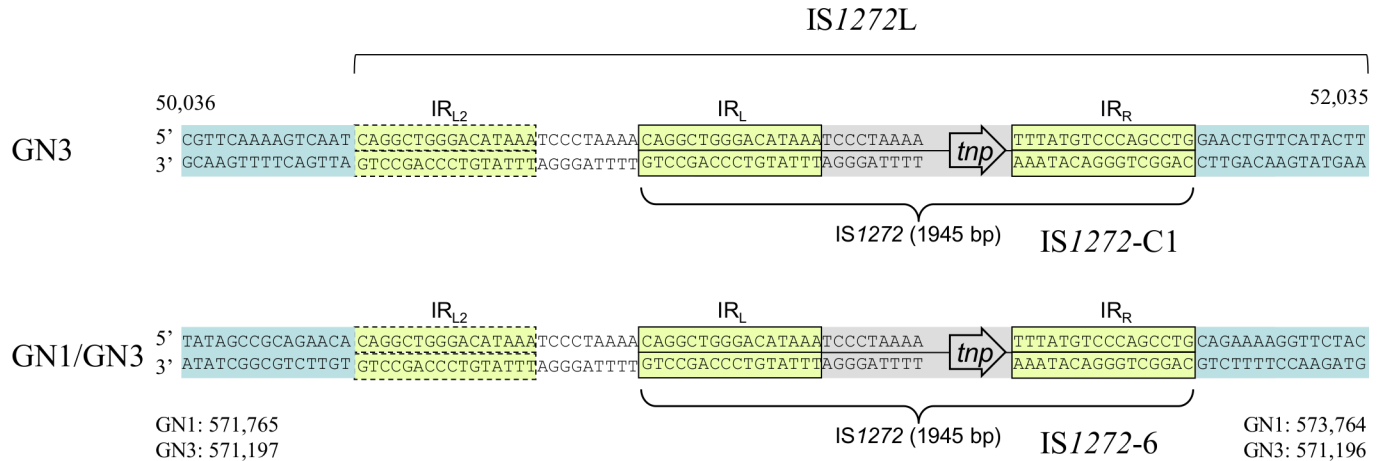

**Fig 4. Structure of IS1272 with tandem duplications of its left side sequence.** ce-IS1272 copy 6 in GN1 and GN3 and ni-IS1272 copy C1 in GN3 formed a larger IS1272 structure (designated as IS1272L) with the same sequence. IS1272L had tandem duplications of the 25-bp left side sequence including IR<sub>L</sub>; the size of IS1272L with IR<sub>L2</sub> and IR<sub>R</sub> is 1,970 bp.

<https://doi.org/10.1371/journal.pone.0187288.g004>

IR<sub>R</sub> of IS1272 (*S. haemolyticus*) are heterogenous with a sequence identity of 15/16 [33], while the IR<sub>L</sub> and IR<sub>R</sub> of IS1272-major form (GN1, GN3) were the same (sequence identity, 16/16).

The 14 copies of IS1272 (GN1) and 15 copies of IS1272 (GN3) were not uniform. Based on the sequence divergence in the transposase gene and terminal IRs, the IS1272 forms were classified into a major form and four minor forms (Fig 3B and 3C). The major form contained copies 1, 3–6, 8, 11, C1, C2, and P1 (Fig 2A and 2B); these copies encoded for 548-amino acid (aa) transposase, had terminal IRs of the same sequences (sequence identity of IR<sub>L</sub> and IR<sub>R</sub>, 16/16), and showed an over all sequence identity of 100% (Fig 3B and 3C). Minor form-1 (copy 12) (Fig 2A and 2B) had a point mutation (nonsynonymous substitution, which caused an amino acid change) in the transposase gene (Fig 3C); minor form-2 (copy 7) (Fig 2A and 2B) had a premature stop codon in the transposase gene, resulting in a truncated (328-aa) transposase (Fig 3B and 3C); minor form-3 (copies 9, 10, and 13) (Fig 2A and 2B) had two or three nonsynonymous substitutions in the transposase gene and also heterogeneous terminal IRs (sequence identity of IR<sub>L</sub> and IR<sub>R</sub>, 14/16) (Fig 3B and 3C); and minor form-4 (copy 2) (Fig 2A and 2B) used a new start codon for the transposase gene, resulting in a 150-aa larger (698-aa) transposase (Fig 3B), and also had heterogeneous terminal IRs (sequence identity of IR<sub>L</sub> and IR<sub>R</sub>, 14/16) (Fig 3C).

IS1272 copy C1, on the GN3 genome (Fig 2A), and IS1272 copy 6, on both the GN1 and GN3 genomes (Fig 2A and 2B), formed a larger structure (IS1272L) with tandem duplications of the 25-bp left side sequence including IR<sub>L</sub>; IS1272L was 1,970 bp in size and had terminal IR sequence (IR<sub>L2</sub>) in addition to an ordinary major form of 1,945-bp IS1272 with IR<sub>L</sub> and IR<sub>R</sub> (Fig 4). Unlike IS256 [29,48], IS1272 did not form an extrachromosomal circular DNA molecule.

### Targets and the mode of transposition for ni-IS1272

A comparison of the GN1 and GN3 genome sequences revealed three cases of ni-IS1272; one case (copy P1) occurred in the GN1 genome and two cases (copies C1 and C2) in the GN3 genome (Fig 5). This new IS1272 insertion on GN1 (copy P1 transposition) occurred at a 24-bp IR structure (with 9-bp terminal IRs and a 6-bp intervening region), which was located 66 bp downstream of the PVL F gene (*luk<sub>pV</sub>F*) in the prophage φPVL-Sa2 (GN3) region (Fig

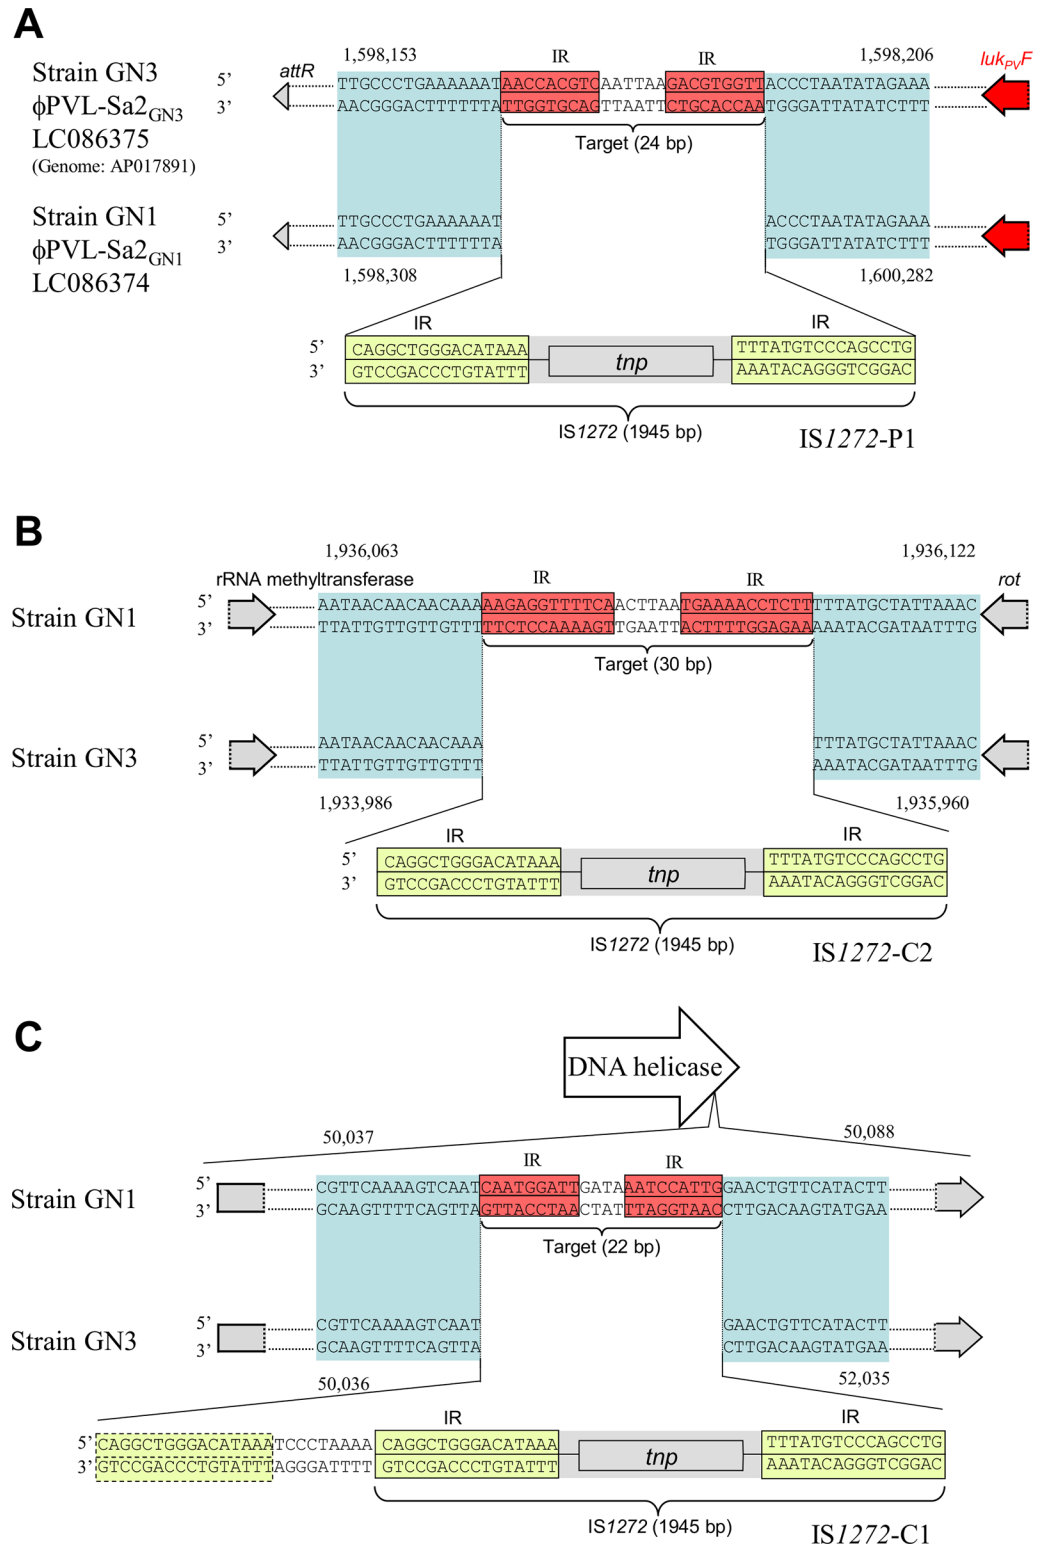

**Fig 5. Evidence of inverted repeats (IR)-replacing transposition for IS1272.** Comparison of GN1 and GN3 genome sequences at a position of newly-inserted IS1272 (ni-IS1272) made it possible to definitely assign a set of target and IS1272 insertion. Color: red, target inverted repeats (IRs); yellow, terminal IRs of IS1272; blue, the same DNA sequence region between GN1 and GN3. In A, IS1272 transposition occurred on the PVL-prophage, targeting a 24-bp sequence with 9-bp IRs and yielding IS1272-P1 (on GN1). In B, IS1272 transposition occurred

in a region downstream of *rot* (and also downstream of the rRNA methyltransferase gene), targeting a 30-bp sequence with 12-bp IRs and yielding IS 1272-C1 (on GN3). In C, IS 1272 transposition occurred within the DNA helicase gene, targeting a 22-bp sequence with 9-bp IRs and yielding the larger IS 1272 structure (IS 1272L) of IS 1272-C1 (on GN3); this IS 1272L may have occurred by the tandem duplication of the 25-bp left side sequence upon transposition or by transposition of IS 1272L. In all the three cases, the target IRs are replaced with IS 1272.

<https://doi.org/10.1371/journal.pone.0187288.g005>

5A, S2 Fig). One new IS1272 insertion in GN3 (copy C2 transposition) occurred at a 30-bp IR structure (with 12-bp terminal IRs and a 6-bp intervening region), which was located 15 bp downstream of *rot* and also down stream of the rRNA methyltransferase gene (Fig 5B); the other new IS1272 insertion in GN3 (copy C1 transposition) occurred at a 22-bp IR structure (with 9-bp terminal IRs and a 4-bp intervening region), which was located within the DNA helicase gene (at the 3'-end region) (Fig 5C). Thus, the targets of all three ni-IS1272 transpositions were IR sequences, albeit with different sizes and different sequences, suggesting that the target is an IR structure (a potential stem-loop structure).

For all three cases, the insertion process may have included the complete separation of the IS1272 IR structure from the flanking donor sequence, the insertion of IS1272 into the target IR site, and the complete separation of the target IR structure from the flanking recipient sequence (“cut-paste-and-cut”), thereby resulting in an IR-replacing model of transposition (or potential stem-loop replacing model of transposition) (Fig 5). There were no TSDs for ni-IS1272 in GN1 and GN3.

## Search for possible targets of ce-IS 1272

The GN1 and GN3 genomes each had 13 copies of ce-IS1272 (Fig 2). To elucidate the targets and modes of the previous transpositions that produced the 13 current copies of ce-IS1272, a database of previously reported *S. aureus* genome sequences was searched for possible target sequences. Seven sets of possible target-containing “database” sequences and IS1272-containing GN1/GN3 sequences suggested the presence of a target IR structure and an IR-replacing mode of transposition, as shown in Fig 6A (for IS1272 copies 1, 3, 4, 7–10).

Based on data from a total of 10 IS1272 copies, ni-IS1272 copies P1, C1, and C2 and ce-IS1272 copies 1, 3, 4, and 7–10, the size of the target IR structure ranged between 21 and 38 bp, while that of the IRs ranged between 7 and 13 bp (Fig 7). In contrast, three ce-IS1272 cases (6, 11, and 12) suggested that there were no IR structures as a target, as shown in Fig 6B; the mode of transposition is not clear for these cases. In the remaining three ce-IS1272 cases (copies 2, 5, and 13), the target sequences were not specific or were too big in size in the present database searches.

## Database searches for the IS 1272 targets and transposition modes that support the IR-replacing mode of transposition

Database searches yielded 19 sets of IS1272 target and transposition sequences, that support the IR-replacing mode of transposition, as shown in S3 Fig. Based on these results, the estimated target IR structure (target terminal IRs) and IS1272 IRs are summarized in Fig 8. The length of IS1272 IRs may be 16 bp (model A), yielding a target IR structure size that ranges between 21 and 85 bp and a target terminal IR size ranging between 5 and 17 bp. These results strongly indicate that the IS1272 transposase recognizes targets as an IR structure (or a stem-loop structure), rather than as a specific sequence. Regarding the sequence of IS1272 IRs, there was an IS1272 copy P1 type (the major form shown in Fig 3C), however, further divergence was noted (Fig 8, model A).



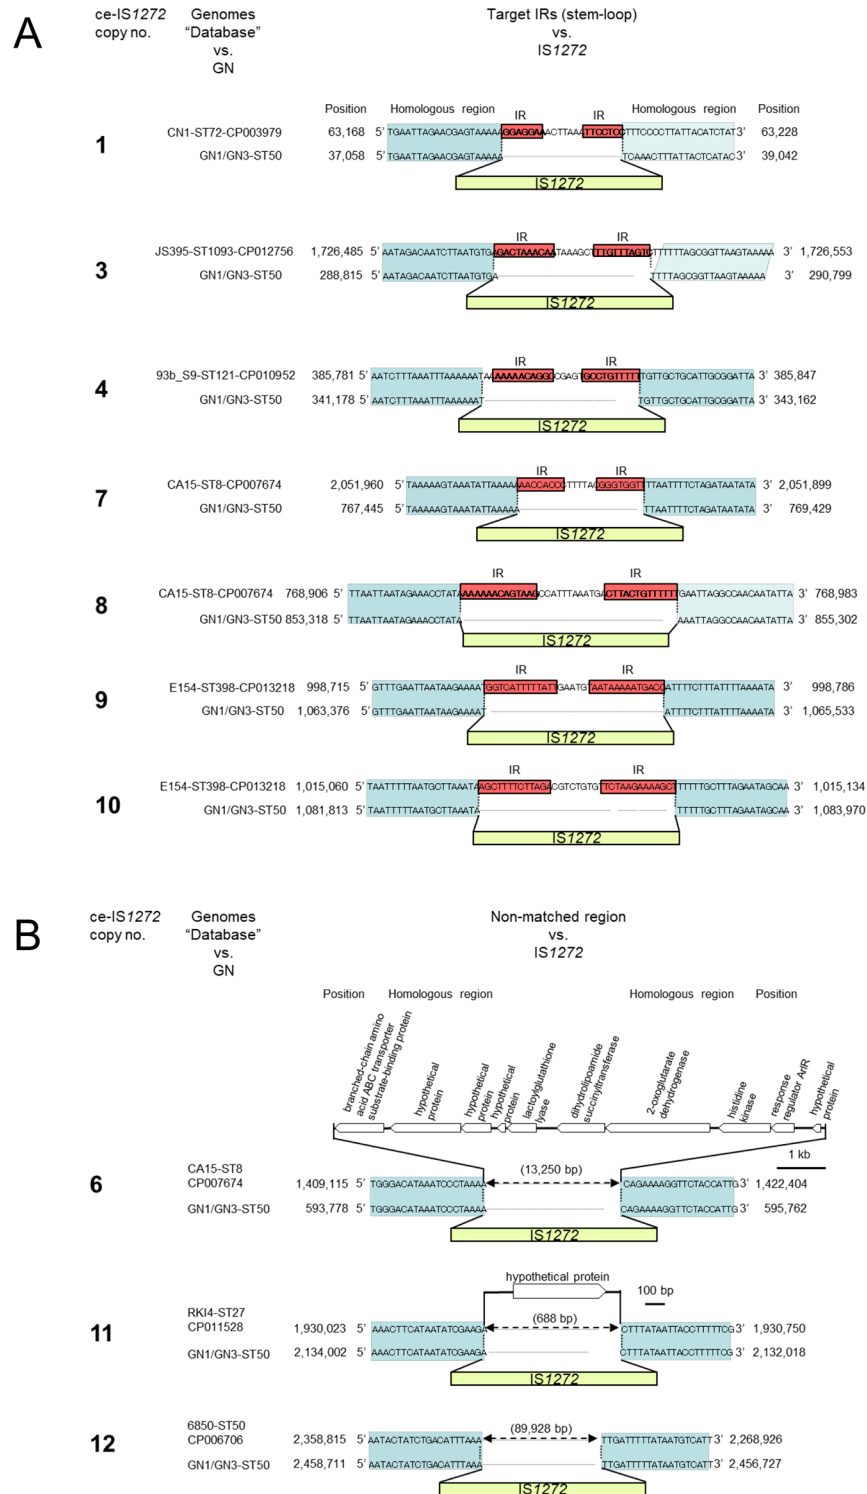

**Fig 6. Analysis of previous transposition modes for current IS1272 copies.** For 13 copies of commonly-existing IS1272 (ce-IS1272) on the GN1 and GN3 genomes, possible targets of transposition were searched in the database. Color: red, target inverted repeats (IRs); yellow, IS1272 with terminal IRs; blue, the same DNA sequence region between the GN1/GN3 genome and the genome searched in the database. In A, the possible targets were IRs for seven copies of ce-IS1272 (copies 1, 3, 4, 7–10). In B, the possible targets were “non-IRs” for three copies of ce-IS1272 (copies 6, 11, 12). For the remaining three copies of ce-IS1272 (copies 2, 5, 13), the possible targets were unknown (target sequences not specific or too big in size).

<https://doi.org/10.1371/journal.pone.0187288.g006>

| IS1272 copy number | Length of target IRs (entire target) | Target IRs (stem-loop) sequence                   |
|--------------------|--------------------------------------|---------------------------------------------------|
| ni-IS1272          |                                      |                                                   |
| P1                 | 9 (24)                               | 5'- <u>AACCACGTCTTAATGACGTGGTT</u>                |
| C1                 | 9 (22)                               | 5'- <u>CAATGGATTGATAAATCCATTG</u>                 |
| C2                 | 12 (30)                              | 5'- <u>AAGAGGTTTTCAAATTAATGAAAACCTCTT</u>         |
| ce-IS1272          |                                      |                                                   |
| 1                  | 7 (21)                               | 5'-GGAGGAAACTTAAATTCCTCC                          |
| 3                  | 10 (27)                              | 5'-GACTAAACAATAAAGCTTTGTTTAGTC                    |
| 4                  | 10 (27)                              | 5'-AAAAAAACAGGCCGAGTGCCTGTTTTT                    |
| 7                  | 8 (22)                               | 5'-AACCACCCTTTTACGGGTGGTT                         |
| 8                  | 13 (38)                              | 5'- <u>AAAAAACAGTAAGCCATTTAAATGACTTACTGTTTTTT</u> |
| 9                  | 13 (32)                              | 5'- <u>GGTCATTTTTATTGAATGTAATAAAAATGACC</u>       |
| 10                 | 13 (35)                              | 5'-AGCTTTTCTTAGACGTCTGTGTTCTAAGAAAAGCT            |

**Fig 7. Target inverted repeat (IR) sequence analysis for IS1272 on the GN genomes.** For newly-inserted IS1272 (ni-IS1272), target site sequences were analyzed by comparing the GN1 and GN3 genome sequences at each ni-IS1272 insertion site. For commonly-existing IS1272 (ce-IS1272), target site sequences were searched from the database. IRs in the target site sequences are underlined. The target site sequences exhibited no sequence homology to each other, suggesting the role of a stem-loop structure as a target of IS1272 transposition.

<https://doi.org/10.1371/journal.pone.0187288.g007>

Due to the two-IR (target and IS1272) nature, an alternate longer estimation of IS1272 IR size may be possible (model B); in this model, the size of IS1272 IRs ranged between 17 and 21 bp, while the size of target IR structures (and target terminal IRs) ranged between 23 and 91 bp (8 to 18 bp).

### Sizes of the IS1272 *tnp* genes

The sizes of the IS1272 *tnp* genes analyzed in the present study are summarized in Fig 9A [33]. The majority of the *tnp* genes encoded for a 548-aa transposase. However, there were two cases of a premature stop codon, resulting in truncated transposases (*S. haemolyticus* IS1272 and IS1272-copy 7) and one case of a larger sequence (IS1272-copy 2), as also shown in Fig 3A and 3B.

The transposase of IS1272-copy 2 was a fusion transposase, which was constructed by isochorismatase (putative) and IS1272 transposase (Fig 9B). There was a link peptide region (PI) between the isochorismatase (putative) domain and IS1272 transposase domain that was also shared by isochorismatase (putative) and IS1272 transposase. The nucleotide sequence corresponding to the link peptide region (PI) was 5'-CCAATA in any case, providing a possible hot spot sequence for the genetic fusion event. The GN1 and GN3 genomes both lacked the isochorismatase (putative) gene, suggesting that the genetic fusion event occurred in other bacterial cells or that the isochorismatase (putative) gene was deleted in GN1 and GN3.

### Characteristic distribution of IS1272 on the GN genomes

The location of IS1272 may affect other genes. In the GN genomes, IS1272 was located as follows: copy P1, at a position 66 bp downstream of the PVL F gene, *luk<sub>PV</sub>F*; copy 7, at a position 3 bp downstream of *scn* in IEC/PR; copy C2, at a position 15 bp downstream of *rot*; and copy 11, at a position 66 bp downstream of *blaZ* in *blaZ-blaR1-blaI (bla-tnp)*. Additionally, the

**Target/transposition set (model A)**

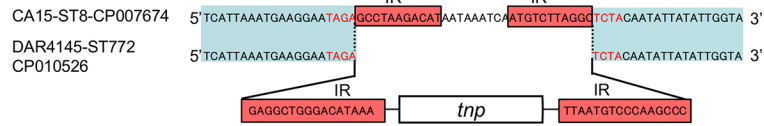

| Target/transposition set | Target                             |                                                                                           | IS1272 IRs  |                     |
|--------------------------|------------------------------------|-------------------------------------------------------------------------------------------|-------------|---------------------|
|                          | Length of IRs (entire target) (bp) | IRs (stem-loop) sequence                                                                  | Length (bp) | sequence            |
| P1                       | 9 (24)                             | 5'-AACCACGTCCTAATGACGTGGTT                                                                | 16          | 5'-CAGGCTGGGACATAAA |
| 2                        | 17 (35)                            | 5'-ACACTATTAAACTTTTTAAAAGTTTAAATAGTGT                                                     | 16          | 5'-CAGGCTGGGACATAAA |
| 3                        | 13 (29)                            | 5'-GCCCTAACCAACAAAGGTTGTAAGGGGC                                                           | 16          | 5'-GAGCTTGGGACATTA  |
| 4                        | 13 (33)                            | 5'-GGCGATTCTATCATACTAGATAGAAGTCGCC                                                        | 16-15       | 5'-GAGCTTGGGACATTA  |
| 5a                       | 13 (28)                            | 5'-GCCCTAACCAACTTTAGTTGTTAGGGGC                                                           | 16          | 5'-GAGCTTGGGACATTA  |
| 5b-I                     | 13 (28)                            | 5'-GCCCTAACCAACTTTAGTTGTTAGGGGC                                                           | 16          | 5'-GAGCTTGGGACATTA  |
| 5b-II                    | 13 (85)                            | 5'-GCCCTTACAACCTTTAGTTGTTAGGGGCTCTATGCATCGCC<br>TTAGCGCAGGCGCTCTACTTTTAACTTTAGTTGTTAGGGGC | 16          | 5'-GAGCTTGGGACATTA  |
| 6                        | 10 (24)                            | 5'-GCCACCCCACTATTGAGATGCC                                                                 | 16-15       | 5'-GAGCTTGGGACATTA  |
| 7                        | 8 (22)                             | 5'-AACCCCGTAAAAGGGTGGTT                                                                   | 16          | 5'-GAGCTTGGGACATTA  |
| 8                        | 9 (30)                             | 5'-AACAGTAAGCCATTAAATGACTTACTGTT                                                          | 16          | 5'-CAGGCTGGGACATAAA |
| 9                        | 7 (21)                             | 5'-GGAGGAACTTAAATTCCTCC                                                                   | 16          | 5'-CAGGCTGGGACATAAA |
| 10                       | 5 (30)                             | 5'-TCTAACACATTAGTTTAAACCAATGCTTAGA                                                        | 15          | 5'-CAGGCTGGGACATAAA |
| 11                       | 9 (22)                             | 5'-AACCGATGCATAAGCATCGGTT                                                                 | 16          | 5'-GAGCTTGGGACATTA  |
| 12                       | 5 (28)                             | 5'-AGAGGCACTAGTTAATTCTAGTACCTCT                                                           | 16          | 5'-CAGGCTGGGACATAAA |
| 13                       | 12 (28)                            | 5'-AAAAGTTCAAGCGCATCTTGAACTTTT                                                            | 16          | 5'-GAGCTTGGGACATTA  |
| 14                       | 11 (28)                            | 5'-GCCTAGGACATAAATCAATGCTCCTAGGC                                                          | 16          | 5'-GAGCTTGGGACATTA  |
| 15                       | 9 (28)                             | 5'-GCCGAGATTTCCACATAATAATCTCGGC                                                           | 16          | 5'-CAGGCTGGGACATAAA |
| 16                       | 7 (23)                             | 5'-GGACTGGATAGTAGTACCAGTCC                                                                | 15-16       | 5'-GAGCTTGGGACATTA  |
| 17                       | 14 (29)                            | 5'-GGTAAGTGCTCAAATTTGAGTATTACC                                                            | 16          | 5'-GAGCTTGGGACATTA  |
| 18                       | 11 (31)                            | 5'-GCCTAAGACATAATAATCAATGCTTAGGC                                                          | 16          | 5'-GAGCTTGGGACATTA  |

**Target/transposition set (model B)**

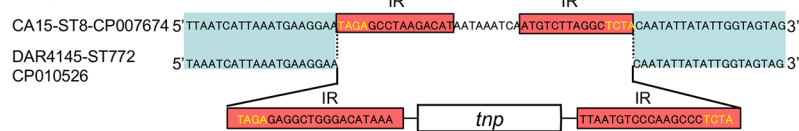

| Target/transposition set | Target                             |                                                                                                 | IS1272 IRs  |                         |
|--------------------------|------------------------------------|-------------------------------------------------------------------------------------------------|-------------|-------------------------|
|                          | Length of IRs (entire target) (bp) | IRs (stem-loop) sequence                                                                        | Length (bp) | sequence                |
| P1                       | 10 (26)                            | 5'-TAACCACGTCCTAATGACGTGGTTA                                                                    | 17          | 5'-TCAGGCTGGGACATAAA    |
| 2                        | 17 (35)                            | 5'-ACACTATTAAACTTTTTAAAAGTTTAAATAGTGT                                                           | 16          | 5'-CAGGCTGGGACATAAA     |
| 3                        | 16 (35)                            | 5'-AAAGCCCTAACCAACAAAGGTTGTAAGGGCCTTT                                                           | 19          | 5'-AAAGAGCTTGGGACATTA   |
| 4                        | 18 (43)                            | 5'-AACAGGGGATTCTATCATACTAGATAGAAGTCGCCTTGTT                                                     | 21-20       | 5'-AACAGAGCTTGGGACATTA  |
| 5a                       | 16 (34)                            | 5'-AGAGCCCTAACCAACTTTAGTTGTTAGGGCTCT                                                            | 19          | 5'-AACAGAGCTTGGGACATTA  |
| 5b-I                     | 16 (34)                            | 5'-AGAGCCCTAACCAACTTTAGTTGTTAGGGCTCT                                                            | 19          | 5'-AGAGAGCTTGGGACATTA   |
| 5b-II                    | 16 (91)                            | 5'-AGAGCCCTTACAACCTTAGTTGTTAGGGGCTCTTATGCATCGCCT<br>TAGCGCAGGCGCTCTACTTTTAACTTTAGTTGTTAGGGGCTCT | 19          | 5'-AGAGAGCTTGGGACATTA   |
| 6                        | 12 (28)                            | 5'-AAGCCCACTATTGAGATGCCCT                                                                       | 18-17       | 5'-AAGAGCTTGGGACATTA    |
| 7                        | 10 (26)                            | 5'-AAAACCCCGTAAAAGGGTGGTTTT                                                                     | 18          | 5'-AAGAGCTTGGGACATTA    |
| 8                        | 13 (38)                            | 5'-AAAAACAGTAAGCCATTAAATGACTTACTGTTTTTT                                                         | 20          | 5'-AAAACAGGCTGGGACATAAA |
| 9                        | 8 (23)                             | 5'-AGGAGAACTTAAATTCCTCCT                                                                        | 17          | 5'-ACAGGCTGGGACATAAA    |
| 10                       | 9 (38)                             | 5'-AAAGCTTAAACATTAGTTTAAACCAATGCTTAGAGCTTT                                                      | 20          | 5'-AAAGCAGGCTGGGACATAAA |
| 11                       | 10 (24)                            | 5'-AACCGATGCATAAGCATCGGTTT                                                                      | 17          | 5'-AGAGCTTGGGACATTA     |
| 12                       | 7 (32)                             | 5'-AAAGAGGCACTAGTTAATTCTAGTACCCTTT                                                              | 18          | 5'-AACAGGCTGGGACATAAA   |
| 13                       | 16 (36)                            | 5'-AAATFAAAAGTTCAAGCGCATCTTGAACTTTTAATT                                                         | 20          | 5'-AAATGAGCTTGGGACATTA  |
| 14                       | 16 (38)                            | 5'-AGCGAGCTAGGACATAAATCAATGCTTAGGCTCGCT                                                         | 21          | 5'-AGCAAGGCTGGGACATTA   |
| 15                       | 9 (28)                             | 5'-GCCGAGATTTCCACATAATAATCTCGGC                                                                 | 16          | 5'-AGGCAAGGCTGGGACATAAA |
| 16                       | 8 (25)                             | 5'-TGGACTGGATAGTAGTACCAGTCCA                                                                    | 16-17       | 5'-TAGAGCTTGGGACATTA    |
| 17                       | 16 (33)                            | 5'-AAGTAAGTGCTCAAATTTGAGTATTACCCT                                                               | 18          | 5'-AAGAGGCTGGGACATAAA   |
| 18                       | 15 (39)                            | 5'-TAGAGCCTAAGACATAATAATCAATGCTTAGGCTCTA                                                        | 20          | 5'-TAGAGGCTTGGGACATTA   |

**Fig 8. Target inverted repeat (IR) sequence analysis using target/IS 1272 sets obtained in database searches.** The IR sequences from 19 target/IS 1272 sets were searched using the database and are summarized in figures. Those for IS 1272 copy P1 are from the GN1/GN3 genomes. Terminal IRs in the target sequences are underlined. IS 1272 IR sequences with red nucleotides represent heterogeneous IRs; red nucleotides are divergent in the left and right IRs. Model A shows the results when the size of IRs is 16 bp; model B shows the results when the size of IRs is 16 bp or more.

<https://doi.org/10.1371/journal.pone.0187288.g008>

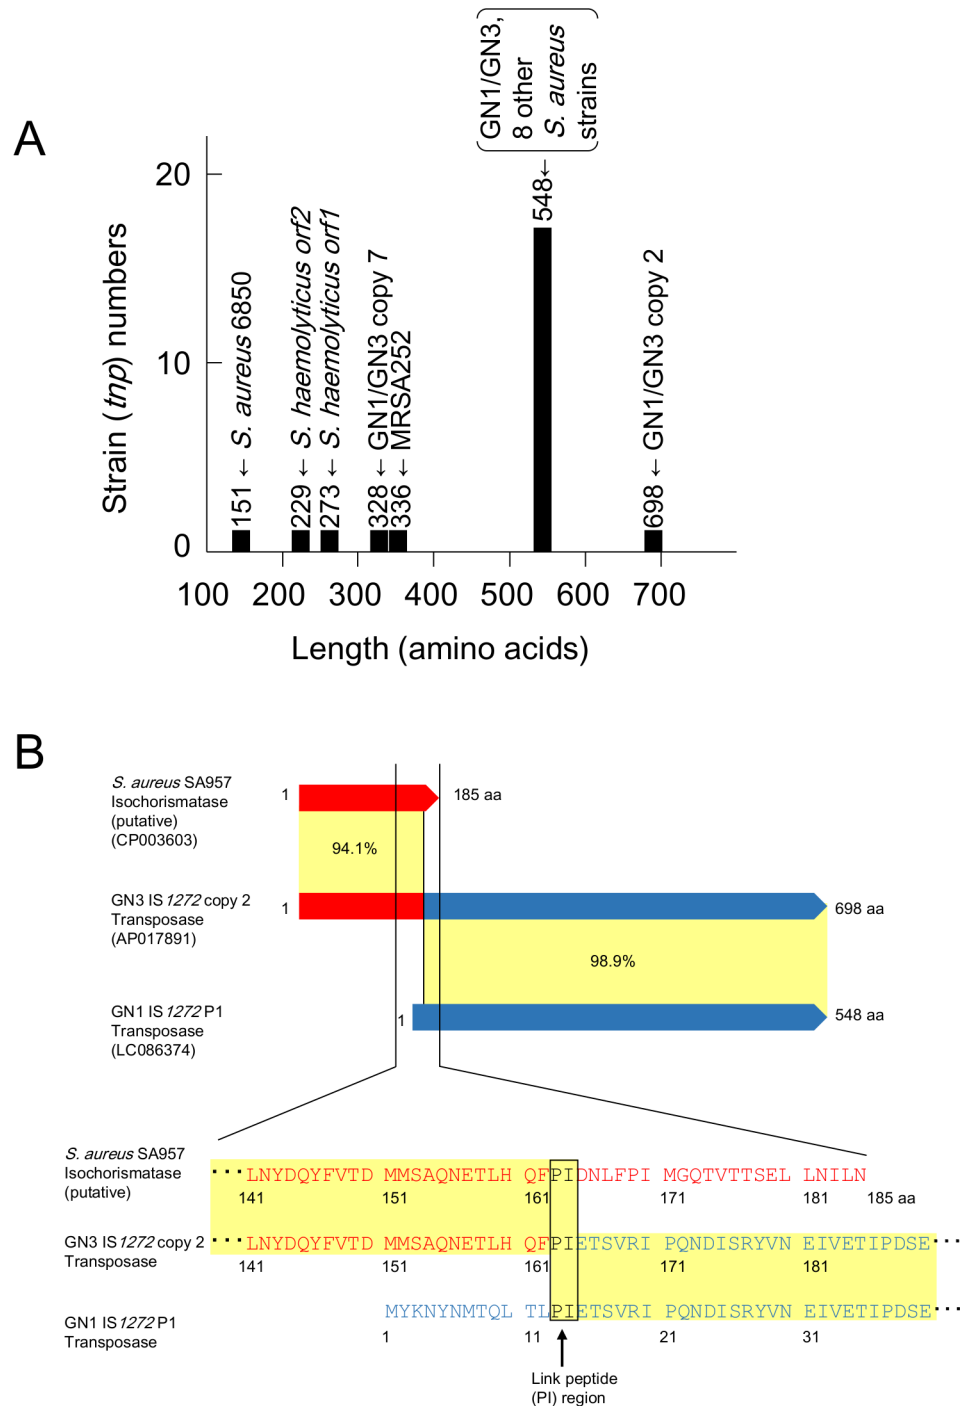

**Fig 9. Variation in size of the IS1272 transposase (tnp) gene (tnp).** (A) The sizes of the IS1272 *tnp* genes in GN1/GN3, other reported *S. aureus* (including MRSA), and *S. haemolyticus* are summarized in figures; other *S. aureus* included strains 6850, MRSA252, TCH60, JKD6159, SA268, T-ORC\_001, SA957, and DAR4145 (they were from the database) and *S. haemolyticus* was from [33]. The majority of *tnp* genes encoded for a 548-aa product. However, for example, GN1/3 copy 7 *tnp* had a premature stop codon, resulting in a truncated product (328 aa); and *S. haemolyticus* IS1272 *tnp* had one base deletion, resulting in a frame shift mutation and two smaller ORFs (229 aa and 273 aa), due to one deletion [31]. Moreover, GN1/3 copy 2 *tnp* encoded for a larger product (698 aa). (B) This figure shows that the *tnp* gene of GN1/3 IS1272 copy 2 encodes for a fusion protein, constructed by isochorismatase (putative), shown in red, and GN1 IS1272 copy P1 transposase, shown in blue. There was a link peptide region (PI), shown in black, between the isochorismatase (putative) domain and IS1272 P1 transposase domain; the same link peptide region was

also present in both isochorismatase (putative) and IS 1272 P1 transposase; the nucleotide sequence corresponding to the link peptide region was 5' -CCAATA.

<https://doi.org/10.1371/journal.pone.0187288.g009>

IS1272 (copy C1) insertion into the DNA helicase gene resulted in a truncated DNA helicase, due to the introduction of an internal stop codon (TAA), which was present in the IR<sub>L2</sub> of IS1272 copy C1 (IS1272L) (Fig 10A). Furthermore, a small (3-kb) deletion was present close to IS1272 (copy 3) on the GN3 genome, but not on the GN1 genome (Fig 10B).

IS1272 (copy 7) was associated with novel genetic structure ICE/PR in the GN1 and GN3 genomes (Fig 10C). The size of IEC/PR was 21,063 bp. IEC/PR was identified as a  $\phi$ Sa3 remnant; it corresponded to the end region of  $\phi$ Sa3 that carries IEC, it carried  $\phi$ Sa3 *att* (although 5 out of 13 nucleotides were divergent), and it lacked the integrase gene on the other side. Its location on each of the GN1 and GN3 genomes was far from the  $\phi$ Sa3 insertion site (*att*) in *hly*. IS1272 may have played a role in the translocation of this remnant.

IS1272 (copy 11) was inserted in the two-region array, *blaI-blaR1-blaZ* and *tnpC-tnpB-tnpA* (*bla-tnp*), resulting in the three-region (structure) array, *blaI-blaR1-blaZ*, IS1272, and *tnpC-tnpB-tnpA* with terminal direct repeats (total size, 10,294 bp) in the GN1 and GN3 genomes (Fig 10D).

## Detection of the PVL prophage with an IS1272 insertion by PCR

The GN1 genome, but not the GN3 genome, had an IS1272 insertion on a region downstream of the PVL F gene on the PVL prophage, as described above. When the other three GN genomes were analyzed by PCR and sequencing for the presence of this IS1272 insertion, GN4 was negative for the IS1272 insertion, while GN2 and GN5 were positive for it (S1 Fig).

## Expression of virulence factors

The PVL production levels of strains GN1 and GN2 were comparative to that of CA-MRSA USA300-0114, used as a control strain, while those of GN3, GN4, and GN5 were two-fold lower (Fig 11). Addition of serum to bacterial culture medium resulted in two fold-higher levels of PVL production in any case (Fig 11).

Regarding mRNA expression (Fig 12), all GN strains except for GN5 expressed the PVL gene at high levels that were similar to (or more than) that of CA-MRSA USA300-0114. Among GN strains, the PVL gene expression levels of GN1 and GN2 were significantly higher than those of GN3 to GN5 ( $P < 0.05$ ). GN1 to GN5 each expressed the PSM $\alpha$  gene at higher levels than did HA-MRSA Mu50 ( $P < 0.05$ ), similar to USA300-0114; notably, GN1 showed higher levels of PSM $\alpha$  gene expression than did the remaining GN strains (GN2 to GN5) ( $P < 0.05$ ). Regarding the Hld gene expression, GN1 to GN5 also expressed higher levels compared with HA-MRSA Mu50 ( $P < 0.05$ ), similar to USA300-0114, and the Hld gene expression level by GN1 was higher than that by the remaining GN strains (GN2 to GN5) ( $P < 0.05$ ).

## Discussion

In the present study, we elucidated the complete circular genome sequences of GN, a community-associated PVL-positive *S. aureus* of genotype ST50/*spa*108(t185)/*agr*4, because it was associated with strong colonization and skin abscesses in a case that was part of a familial infection. ST50 *S. aureus* may not be a globally disseminated lineage; however, the GN *agr* type was the same as that of globally disseminated, hyper-virulent PVL-positive ST121/*agr*4 MSSA [49,50]. The genome of ST50/*spa*t185 *S. aureus* was reported previously; this strain (6850) was isolated from a skin abscess case in Belgium, which progressed to further invasive infections



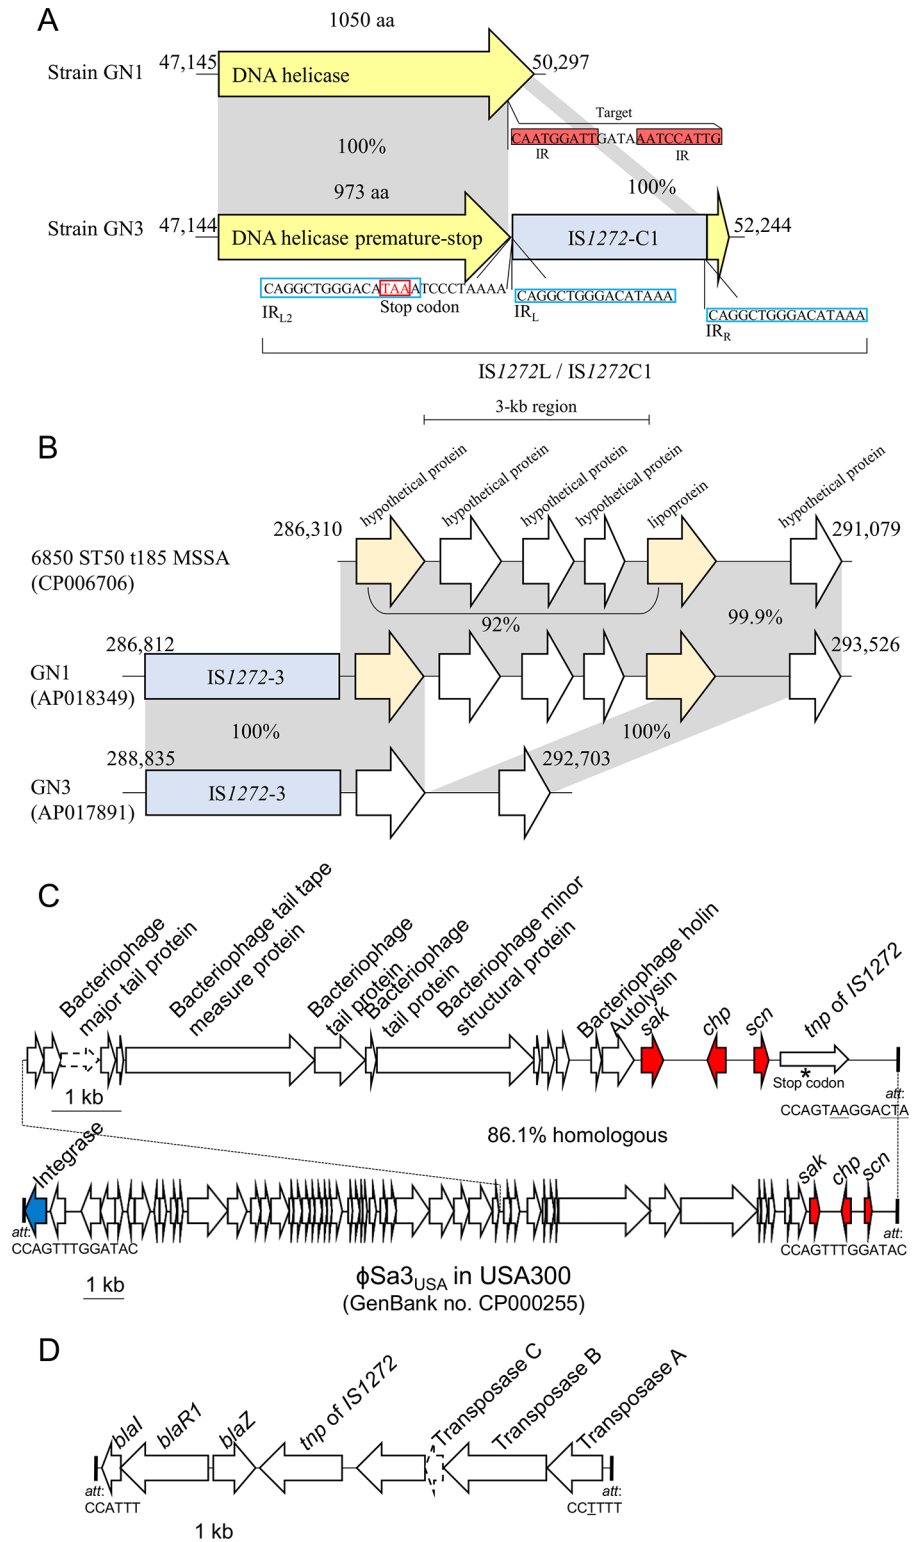

**Fig 10. Unique genetic structures on the GN1 and GN3 genomes.** (A) The GN3 genome, but not GN1 genome, had IS1272 insertion within the DNA helicase gene, yielding newly-inserted IS1272 (ni-IS1272) copy C1. The copy C1 formed a larger IS1272 structure (IS1272L) with a tandem duplication of the 25-bp left side sequence including IR<sub>L</sub>. Due to the IS1272 C1 insertion, particularly the internal stop codon TAA which was present in IR<sub>L2</sub> of IS1272L, the DNA helicase gene product was estimated to be truncated (973-aa) DNA

helicase. (B) The GN3 genome had a small (3-kb) deletion close to IS1272 (copy 3); the 3-kb region was present on the GN1 genome and also on the genome of related ST50 MSSA strain 6850. (C) The immune evasion cluster (IEC), carrying *sak* for staphylokinase (SAK), *chp* for chemotaxis inhibitory protein of *S. aureus* (CHIPS), and *scn* for staphylococcal complement inhibitor (SCIN), was carried by the  $\phi$ Sa3 remnant. This structure, IEC/PR, had the *att* of  $\phi$ Sa3; 5 out of 13 nucleotides were divergent (divergent nucleotides are underlined). Its location was not *hnb* (insertion site of  $\phi$ Sa3). GN1 and GN3 lacked  $\phi$ Sa3, and *hnb* was intact. The IEC/PR structure carried one IS1272 copy (copy 7). (D) The *blaZ, R1, l-tnpA, B, C* structure encodes for penicillin resistance. This structure is flanked by short (6-bp) direct repeats. This structure also carried one IS1272 copy (copy 11).

<https://doi.org/10.1371/journal.pone.0187288.g010>

such as bacteremia and osteomyelitis [51] (GenBank accession number, CP006706). Notably, the clinically important and, thus, well-characterized strain 6850 was PVL-negative and lacked phage 2, but it also carried multiple copies of IS1272 (11 copies/genome). Having multiple IS1272 copies may be linked with this lineage. Characteristic virulence factors for CA-MSSA GN include PVL [9,11–15,17], the stronger expressions of *psmA* and *hld* compared with HA-MRSA [12,19], collagen adhesin [52,53], and the immune evasion factors SAK, CHIPS, and SCIN [9, 27,45,54].

In 2007 [39], based on the findings obtained by PCR and sequence analyses of PVL gene regions with and without IS1272 (GenBank accession numbers AB256036–39, 2006), we proposed the concept of stem-loop-replacing transposition. Here, to further investigate the IR-replacing transposition of IS1272, we attempted to elucidate the underlying mechanisms in

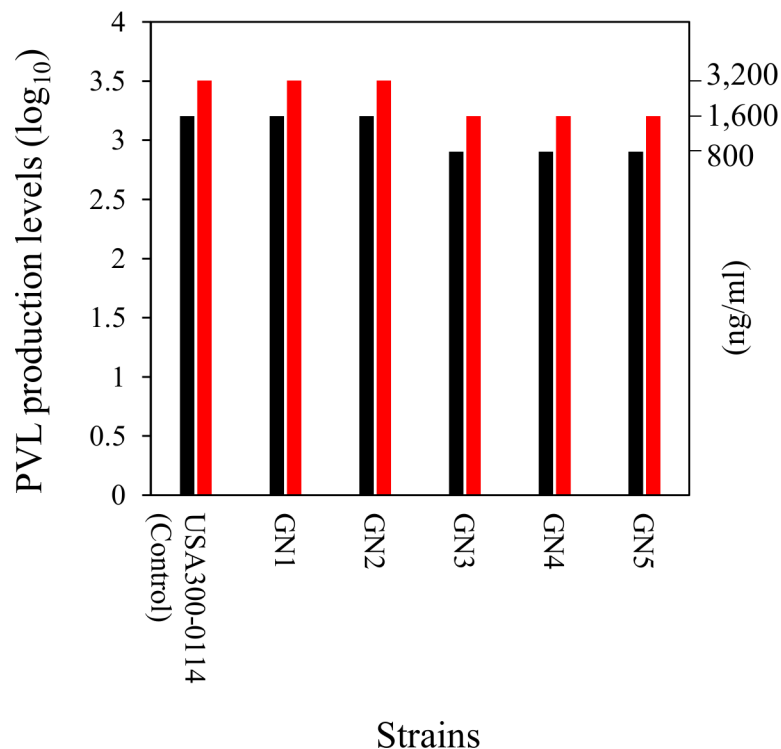

**Fig 11. Pantone-Valentine leukocidin (PVL) production levels of familial strains GN1 to GN5.** Bacteria were grown in a liquid medium for 18 h with or without 5% fetal bovine serum (FBS), serial doubling dilutions of the culture supernatants were made, and the amounts of PVL in the supernatants were serologically measured. Bars (color): black, PVL production in the absence of FBS; red, PVL production in the presence of FBS. The PVL production levels of GN1 and GN2 were two-fold higher than those of GN3, GN4, and GN5. Addition of serum to the bacterial culture medium resulted in two fold-higher PVL production levels in any case. USA300-0114 was used as a PVL-positive control strain.

<https://doi.org/10.1371/journal.pone.0187288.g011>

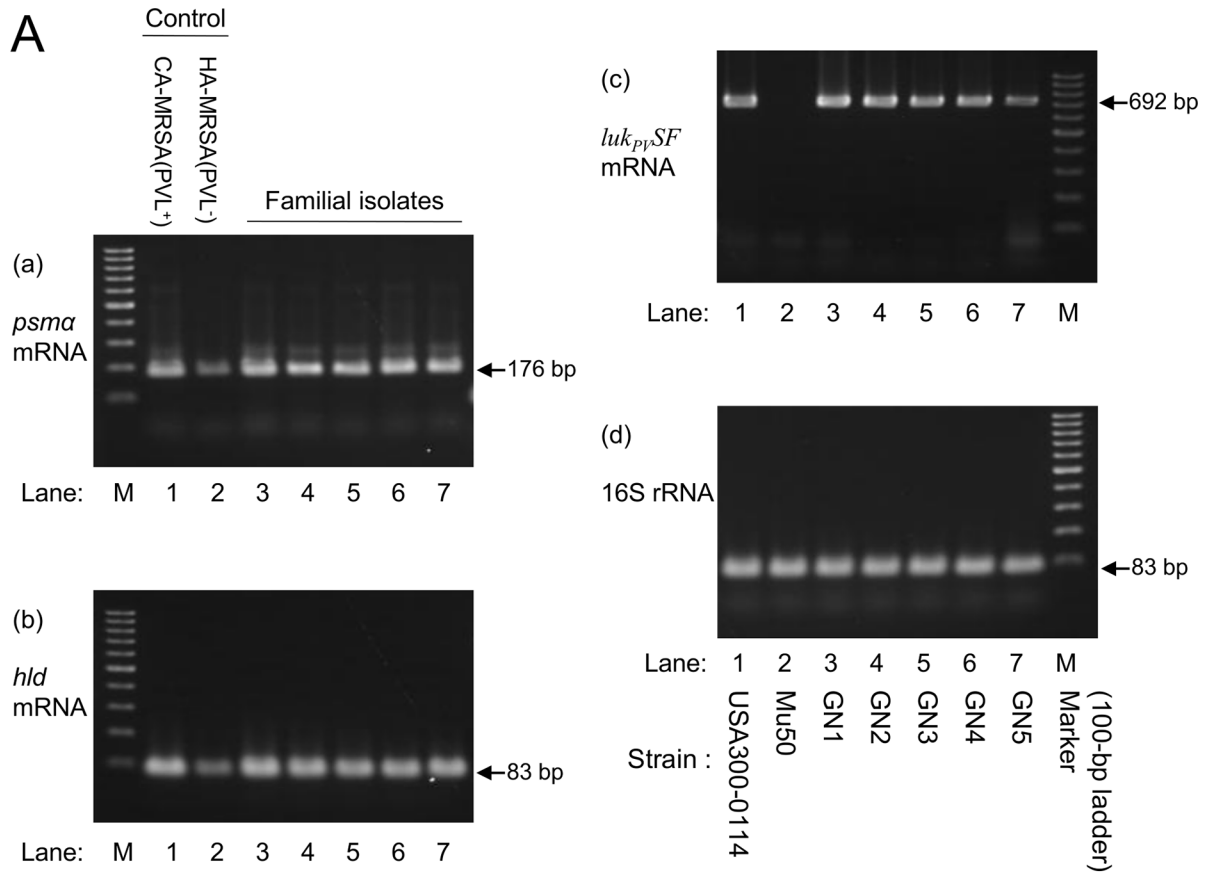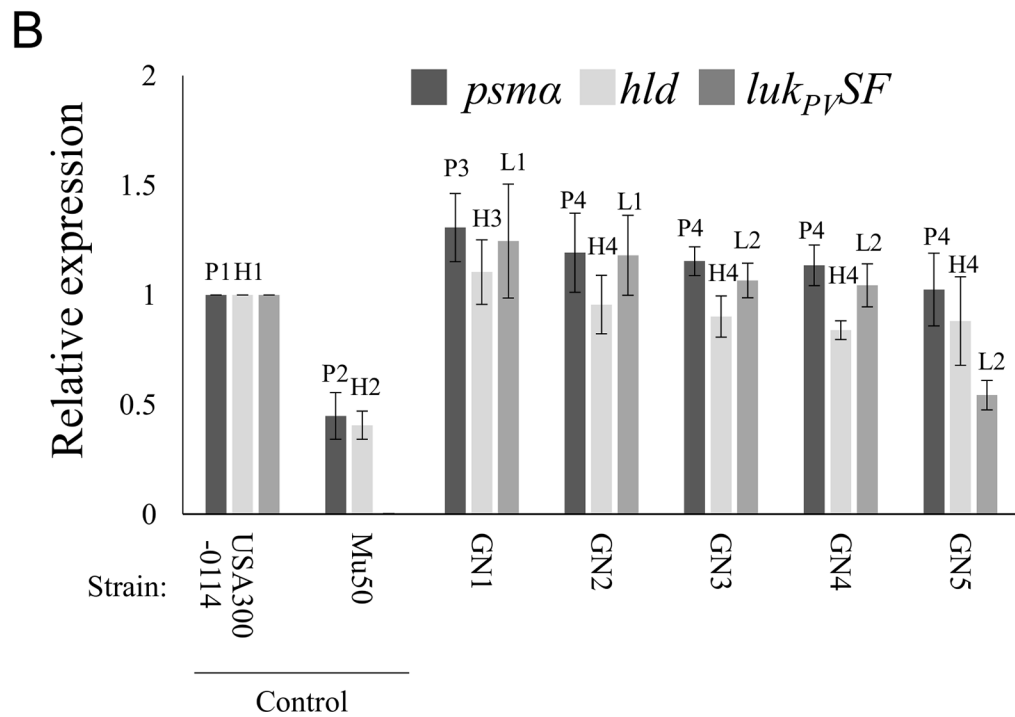

**Fig 12. mRNA expression levels of cytolytic peptide genes (*psma* and *hld*) and Panton-Valentine leukocidin (PVL) genes (*luk<sub>PV</sub>SF*) in familial strains GN1 to GN5.** Bacteria were grown on sheep blood agar for 8 h, and the mRNA expression levels were examined by an RT-PCR assay. PVL-positive CA-MRSA USA300-0114 was used as a control strain which shows high expression levels for *psma* and *hld*, and PVL-negative HA-MRSA Mu50 was used as a control strain which shows low expression levels for *psma* and *hld*. In (A), the products in an RT-PCR assay were visualized on 2% agarose gels after electrophoresis. In (B), the expression data of each strain were normalized to those of USA300-0114. For *psma*: P1 vs. P2,  $P < 0.05$ ; P3 vs. P2,  $P < 0.05$ ; P4 vs. P2,  $P < 0.05$ ; P3 vs. P4 (group of GN2, GN3, GN4, and GN5),  $P < 0.05$ . For *hld*, H1 vs. H2,  $P < 0.05$ ; H3 vs. H2,  $P < 0.05$ ; H4 vs. H2,  $P < 0.05$ ; H3 vs. H4 (group of GN2, GN3, GN4, and GN5),  $P < 0.05$ . For PVL genes: L1 (group of GN1 and GN2) vs. L2 (group of GN3, GN4, and GN5),  $P < 0.05$ . The LVL mRNA expression level of GN5 was unexpectedly low, compared with that of other familial strains ( $P < 0.05$ ). PVL-positive CA-MRSA strain RS08 and CA-MSSA strain KT1 were also used as strong *psma/hld* expression control strains, the data being comparable to that of CA-MRSA USA300-0114 (for *psma*, 1.00, 1.09, and 0.92 for USA300-0114, RS08, and KT1, respectively; and for *hld*, 1.00, 0.85, and 0.79 for USA300-0114, RS08, and KT1, respectively); and HA-MRSA strain N315 was also used as a low *psma/hld* expression control strain, the data being comparable to that of HA-MRSA Mu50 (for *psma*, 0.45 and 0.38 for Mu50 and N315, respectively; and for *hld*, 0.41 and 0.30 for Mu50 and N315, respectively).

<https://doi.org/10.1371/journal.pone.0187288.g012>

more detail by performing a comprehensive comparison between GN genomes focusing on the status of multiple *IS1272* copies, including ni-*IS1272* and ce-*IS1272*.

Based on the results of the present study, together with previous findings reported by others [23,28,55], we proposed a potential transposition mechanism (shown in Fig 13). Basically, in the transposition of transposable elements (TEs) catalyzed by DDE transposase, the first step is the hydrolysis of the phosphodiester backbone at each end of the TE to generate free 3' OH ends [55]. The exposed 3' OH ends are then joined to the target DNA in a trans-esterification reaction. Thus, neither of the 5' ends of the TE are joined with the 3' ends of target DNA. In cases in which the attacked site of the top strand is upstream of the site of the bottom strand, the single-stranded sequences at both sides of the TE need to be repaired. Therefore, if the 3' ends of TE are joined to the target DNA at the 5' foot of the stem-loop, it may result in the duplication of the whole stem-loop (Fig 13, pathway b). If the 3' ends of the TE are joined to the target DNA at the 5' end of the loop, it may result in the duplication of the loop only (Fig 13, pathway c). However, if the 3' ends of the TE (*IS1272* in this case) are joined to the target DNA at the 3' foot of the stem-loop (Fig 13 3A and 13 4A), the stem-loop cannot be replicated unless the opposite strands are cleaved. It is more likely that the two stem-loop sequences become removed by 3' exonucleases, which results in the deletion of stem-loop sequences. We propose that this is a potential transposition mechanism for *IS1272*, and we have designated this potential mechanism as “replacement by structure-dependent transposition (RST)”, “stem-loop replacing transposition”, or “cut-paste-and-cut”. Additional evidence for this potential mechanism is currently being investigated.

In general, the transposition of ISs or any DDE-type transposons generates TSDs upon transposition [23,28]. The feature of stem-loop replacement in the *IS1272* transposition is an irreversible process, in contrast with the “canonical” transposition that can be reversed by recombinational deletions between two target site duplications [23,28,56]. The basis of the differences between “canonical” IS transposition and *IS1272* transposition is likely in their transposition mechanisms. Therefore, we may be able to use such differences to control *IS1272* without affecting other IS elements or to control other ISs without affecting *IS1272*. Saturation mutagenesis using *IS1272* is one possible direction for assessing the effect of promoting *IS1272* transposition.

It is possible that inhibitors capable of blocking the transposition of *IS1272* could help overcoming the spread of MRSA. Alternately, the promotion rather than inhibition of *IS1272* transposition may help overcome the spread of MRSA. Given that the supercoiling of genomic DNA enhances the cruciform form, intercalates that can enhance supercoiling could be candidate promoters of *IS1272* transposition, and antagonizing intercalation may be a way to inhibit the transposition of *IS1272*. Although the clinical application of these modifications is not

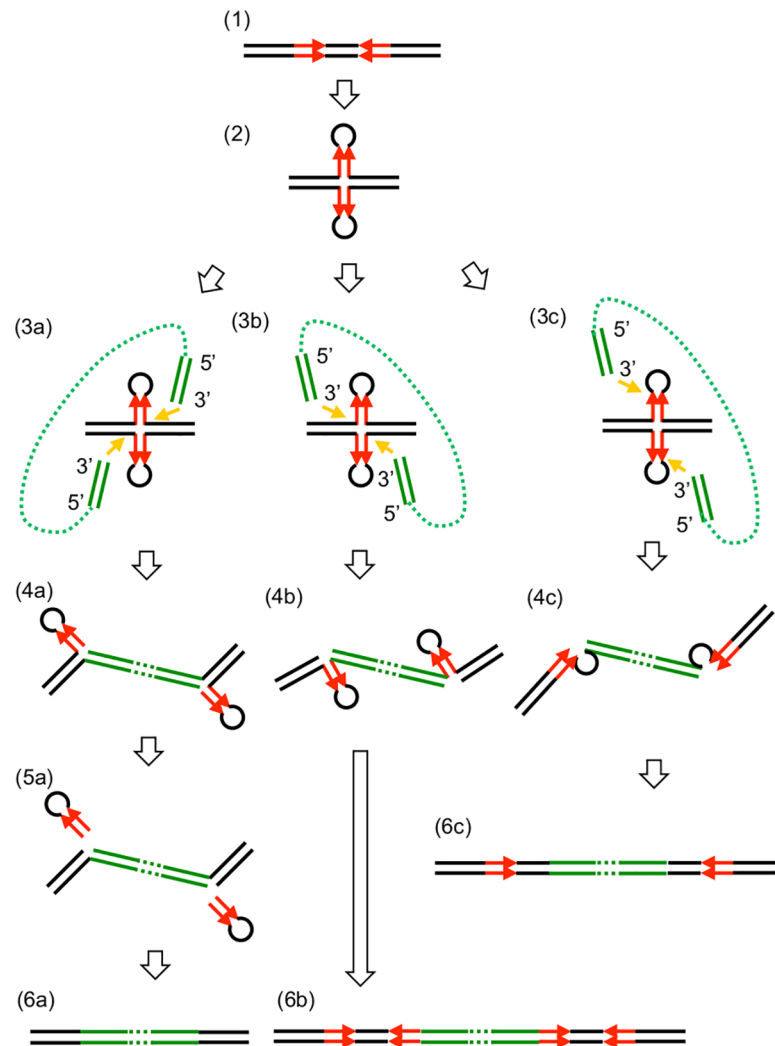

**Fig 13. Replacement by structure-dependent transposition (RST) or stem-loop replacement: A possible model for the transposition mechanism of IS1272.** (1) Palindromic sequences (red) are present in donor and recipient sequences. (2) Palindromic sequences form a cruciform. (3a-4a) The 3' ends of IS1272 (stem-loop) attack and are joined to the target DNA at the 3' feet of two stem-loops. (5a) The stem-loops on recipient sequences are removed. (6a) IS is inserted, replacing a stem-loop sequence. (3b-4b) The 3' ends of IS attack and are joined to the target DNA at the 5' feet of the two stem-loop. (6b) The sequence forming the stem-loop is duplicated at both ends of IS. (3c-4c) The 3' ends of IS attack and are joined to target DNA at the 5' of two loops. (6c) The sequence corresponding to the two loops is duplicated at both ends of IS. Red arrows, palindromic sequences; green lines, IS DNA.

<https://doi.org/10.1371/journal.pone.0187288.g013>

immediate, the advance in understanding the diversity in transposition mechanisms of ISs and transposons contributes to the future control of bacterial infections.

During the preparation of this manuscript, Furi et al. [57] published a study on the transposition of two composite Tns (TnSha1 and TnSha2), which had IS1272 as a component, and they demonstrated that these two composite Tns removed the stem-loop sequences upon transposition. However, the *tnp* of composite Tn (TnSha1) has no stop codon, resulting in a larger predicted product, and has three IS1272 IRs in its complex structure, thereby making it difficult to elucidate the precise mechanism underlying IS1272 transposition. Siguier et al. [28] described an IS1182 family that included heterogeneous members (including IS1272), in which some members targeted palindromic sequences, but they did not provide detailed data.



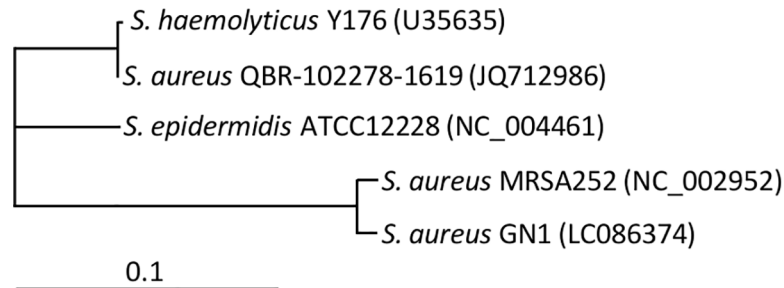

**Fig 14. Cluster analysis of IS1272 from *S. aureus*, *S. epidermidis*, and *S. haemolyticus*.** GenBank accession numbers are shown in parentheses.

<https://doi.org/10.1371/journal.pone.0187288.g014>

Thus, the present study is the first to demonstrate the precise structure, transposition, and model of IS1272.

The cluster analysis of IS1272 from *S. aureus*, *S. epidermidis*, and *S. haemolyticus* (Fig 14) indicated that our IS1272 (GN1) showed high homology to IS1272 from *S. aureus* MRSA252, but, it exhibited more divergence from the IS1272 sequences of *S. epidermidis* ATCC12228 and *S. haemolyticus* Y176 (the original strain in which IS1272 was initially characterized) [33]. IS1272 from *S. aureus* QBR-102278-1619 is closely related to *S. haemolyticus* IS1272; however, since IS1272 from *S. aureus* QBR-102278-1619 is a constituent of a composite Tn carrying *S. haemolyticus* gene, *fabI* [57], there is a possibility that it originated in *S. haemolyticus*.

Although IS1272 was first found and characterized in *S. haemolyticus*, and is considered to have originally resided in *S. haemolyticus* [33], IS1272 can also be an important constituent in *S. aureus*, for example as a multi-IS1272 copy system. We speculate that IS1272 has been evolving through adaptation to *S. aureus*.

Regarding unique genetic traits, the GN1 and GN3 genome each contained the immune evasion cluster carried by a phage 3 remnant (IEC/PR) for virulence and *blaZ,R1,I-tnpA,B,C* for drug resistance. IS1272 was a constituent of these genetic structures. GN3, but not GN1, had a small deletion within the genome, relatively close to IS1272; however, the relation of IS1272 to this deletion is not clear. IS1272 may play a role in chromosomal rearrangements in *S. aureus*.

Regarding the location of IS1272, there were four cases of insertion that occurred very close to genes; in all four cases, IS1272 was inserted immediately downstream of the genes.

IS1272 is a flexible IS, but it also behaves in a strictly regulated manner. Its strict features include 16-bp IRs [33] [this study] and targets of IRs [28,39,57] [this study]. Its flexible features include variable sequences of IRs [33] [this study], variable lengths of IS1272 [33,57] [this study], duplication of the terminal sequence including the terminal IR [this study], variable sizes and structures of *tnp* [33,57] [this study], and possibly variable modes of transposition [this study]. A large fusion transposase with a unique linker peptide region was demonstrated for the first time in the present study; however, it was a minor form.

Among the five GN familial strains, the patient strain (GN1) manifested the highest levels of PVL production and of *psm $\alpha$*  and *hld* expression. The importance of PSM $\alpha$  in SSTIs has been increasingly reported [58,59]. Although GN5 had a PVL prophage with an IS1272 insertion, the GN5 PVL production level was comparable to those of GN3 or GN4, whose PVL prophages did not have an IS1272 insertion. Interestingly, the GN5 PVL mRNA expression level was low compared with that of other GN strains. The background mechanism for the high virulence potential of GN1 needs to be elucidated.

In conclusion, this study is the first to present evidence for a novel IR-replacing mode of transposition and sequence data that suggests a potential stem-loop-replacing transposition

mechanism for *IS1272*. We performed a comprehensive comparison of the whole-genomic sequences of familial strains of one *S. aureus* clone (GN) that was isolated from a five-person familial infection case. Notably, the *IS1272* transposition appeared to have occurred via an irreversible process, unlike that of the reversible “canonical” transposition of IR and Tn. *IS1272* sequences existed as a multi-*IS1272* system in the *S. aureus* genome, accompanying strictly regulated but also flexible structures. Basic investigation of the *IS1272* mechanism may lead to a new method of MRSA control in the future. *IS1272* was linked to IEC and drug resistance segments and was located both near a deletion and close to several genes, suggesting its possible role in chromosomal rearrangements. Although *IS1272* was originally isolated and characterized in *S. haemolyticus*, it plays a role in clinically important *S. aureus*. The present study also demonstrates that the patient strain in this familial infection case had an increased virulence potential based on community-associated virulence factors.

## Supporting information

**S1 Fig. PCR detection of *IS1272* insertions on the Pantone-Valentine leukocidin (PVL)-prophage using GN familial strains.** The applied familial strains were GN1 (patient strain) and GN2 to GN5. In the course of the previous study on the PVL S/F genes (*luk<sub>PV</sub>SF*), we determined the sequences of not only the entire PVL gene but also its upstream and downstream regions of clinical *S. aureus* isolates by PCR and sequencing, and detected an *IS1272* transposition in a region distal of the PVL F gene. PCR primers, PVL-1 and NPVL-2, were from reference [44]. Other PCR primers were designed based on the DNA sequence of a PVL prophage carried by ST30 CA-MRSA strain NN1 [37] and  $\phi$ PVL-Sa2<sub>GN1</sub> and  $\phi$ PVL-Sa2<sub>GN3</sub>. The primers for *IS1272* were designed based on the  $\phi$ PVL-Sa2<sub>GN1</sub> sequence, which had an *IS1272* insertion. Of three primer sets (A to C), B detects the terminal IRs of the target of *IS1272*; thus, GN1, GN2, and GN5 (in which the target was replaced by *IS1272*) produced negative results in PCR using primer set B. Six PCR primer sets (1 to 6) were used to investigate the presence of an insertion at the region located downstream of the PVL genes. The insertion of *IS1272* (size, ca. 2 kb) was checked by PCR product sizes and PCR product sequences. GN1, GN2, and GN5 had a ca. 2-kb insertion (corresponding *IS1272*), while the parent's strains (GN3 and GN4) did not.

(TIF)

**S2 Fig. Structures of PVL-covering prophages,  $\phi$ PVL-Sa2<sub>GN1</sub> and  $\phi$ PVL-Sa2<sub>GN3</sub>.**  $\phi$ PVL-Sa2<sub>GN1</sub> (of patient strain GN1) had *IS1272* insertion (*IS1272* copy P1) in a region distal to the PVL F gene, while  $\phi$ PVL-Sa2<sub>GN3</sub> (of a parent/female strain) had no *IS1272* insertion.  $\phi$ PVL-Sa2<sub>GN1</sub> and  $\phi$ PVL-Sa2<sub>GN3</sub> were highly homologous to  $\phi$ PVL-Sa2 of JCSC7401 (ST80 MRSA).

(TIF)

**S3 Fig. Database searches for the target/*IS1272* sequence sets for *IS1272*.** Color: red, target inverted repeats (IRs); yellow, *IS1272* with terminal IRs; blue, the same DNA sequence region between the genomes carrying the targets or *IS1272* insertion. Target/transposition set P1 represents an example obtained by comparison between the GN1 and GN3 genomes.

(TIF)

## Acknowledgments

This study was supported mainly by personal (TY) money including that obtained from lectures at universities and colleges. This study was also supported partly by reagents and other research materials used in routine research works for Ph. D students (TWW, WH, YI, TT, and YTL) in National Taiwan University College of Medicine and Niigata University Graduate

School of Medical and Dental Sciences and for staffs (OEK, WCH, OVP, KKK, ABS, and LJT) in Krasnoyarsk State Medical University, Kaohsiung Medical University, and National Cheng Kung University, and by routine clinical works for staffs (MW and NI) in Kido Hospital. There was no specific funding during this study and any authors did not receive a salary for this specific study.

## Author Contributions

**Conceptualization:** Tsai-Wen Wan, Wataru Higuchi, Tatsuo Yamamoto.

**Data curation:** Tsai-Wen Wan, Wataru Higuchi, Tatsuo Yamamoto.

**Formal analysis:** Tsai-Wen Wan, Wataru Higuchi, Olga E. Khokhlova, Wei-Chun Hung, Tatsuo Yamamoto.

**Funding acquisition:** Alla B. Salmina, Lee-Jene Teng, Tatsuo Yamamoto.

**Investigation:** Tsai-Wen Wan, Wataru Higuchi, Olga E. Khokhlova, Wei-Chun Hung, Yasuhisa Iwao, Masataka Wakayama, Noriyoshi Inomata, Tomomi Takano, Yu-Tzu Lin, Kenji K. Kojima, Tatsuo Yamamoto.

**Methodology:** Tsai-Wen Wan, Wataru Higuchi, Olga E. Khokhlova, Wei-Chun Hung, Tatsuo Yamamoto.

**Project administration:** Masataka Wakayama, Noriyoshi Inomata, Olga V. Peryanova, Alla B. Salmina, Lee-Jene Teng, Tatsuo Yamamoto.

**Resources:** Olga V. Peryanova, Alla B. Salmina, Lee-Jene Teng, Tatsuo Yamamoto.

**Software:** Tsai-Wen Wan, Wataru Higuchi, Wei-Chun Hung, Yasuhisa Iwao, Tomomi Takano, Yu-Tzu Lin, Kenji K. Kojima.

**Supervision:** Alla B. Salmina, Lee-Jene Teng, Tatsuo Yamamoto.

**Validation:** Olga V. Peryanova, Alla B. Salmina, Lee-Jene Teng, Tatsuo Yamamoto.

**Visualization:** Tsai-Wen Wan, Tatsuo Yamamoto.

**Writing – original draft:** Tsai-Wen Wan, Wataru Higuchi, Olga E. Khokhlova, Wei-Chun Hung, Kenji K. Kojima, Tatsuo Yamamoto.

**Writing – review & editing:** Tsai-Wen Wan, Tatsuo Yamamoto.

## References

1. Tacconelli E, Tumbarello M, Cauda R. *Staphylococcus aureus* infections. *N Engl J Med*. 1998; 339,2026–2027.
2. Tenover FC, Gorwitz RJ. The epidemiology of *Staphylococcus* infections. In: Fischetti VA, Novick RP, Ferretti JJ, Portnoy DA, Rood JI, editors. *Gram-positive pathogens*, 2nd Ed. Washington, DC: ASM Press; 2006. pp. 526–534.
3. Powers ME, Bubeck Wardenburg J. Igniting the fire: *Staphylococcus aureus* virulence factors in the pathogenesis of sepsis. *PLoS Pathog*. 2014; 10:e1003871. <https://doi.org/10.1371/journal.ppat.1003871> PMID: 24550724
4. Kobayashi SD, Malachowa N, DeLeo FR. Pathogenesis of *Staphylococcus aureus* abscesses. *Am J Pathol*. 2015; 185:1518–1527. <https://doi.org/10.1016/j.ajpath.2014.11.030> PMID: 25749135
5. Tong SY, Davis JS, Eichenberger E, Holland TL, Fowler VG Jr. *Staphylococcus aureus* infections: epidemiology, pathophysiology, clinical manifestations, and management. *Clin Microbiol Rev*. 2015; 28,603–661. <https://doi.org/10.1128/CMR.00134-14> PMID: 26016486
6. International Working Group on the Classification of Staphylococcal Cassette Chromosome Elements (IWG-SCC). Classification of staphylococcal cassette chromosome *mec* (SCC*mec*): guidelines for

- reporting novel SCC*mec* elements. *Antimicrob Agents Chemother.* 2009; 53:4961–4967. <https://doi.org/10.1128/AAC.00579-09> PMID: 19721075
7. Klevens RM, Morrison MA, Nadle J, Petit S, Gershman K, Ray S, et al. Invasive methicillin-resistant *Staphylococcus aureus* infections in the United States. *JAMA* 2007; 298:1763–1771. <https://doi.org/10.1001/jama.298.15.1763> PMID: 17940231
  8. David MZ, Daum RS. Community-associated methicillin-resistant *Staphylococcus aureus*: epidemiology and clinical consequences of an emerging epidemic. *Clin Microbiol Rev.* 2010; 23:616–687. <https://doi.org/10.1128/CMR.00081-09> PMID: 20610826
  9. Yamamoto T, Hung WC, Takano T, Nishiyama A. Genetic nature and virulence of community-associated methicillin-resistant *Staphylococcus aureus*. *BioMedicine.* 2013; 3:2–18.
  10. Uhlemann AC, Otto M, Lowy FD, DeLeo FR. Evolution of community- and healthcare-associated methicillin-resistant *Staphylococcus aureus*. *Infect Genet Evol.* 2014; 21:563–574. <https://doi.org/10.1016/j.meegid.2013.04.030> PMID: 23648426
  11. Yamasaki O, Kaneko J, Morizane S, Akiyama H, Arata J, Narita S, et al. The association between *Staphylococcus aureus* strains carrying panton-valentine leukocidin genes and the development of deep-seated follicular infection. *Clin Infect Dis.* 2005; 40:381–385. <https://doi.org/10.1086/427290> PMID: 15668860
  12. Diep BA, Otto M. The role of virulence determinants in community-associated MRSA pathogenesis. *Trends Microbiol.* 2008; 16:361–369. <https://doi.org/10.1016/j.tim.2008.05.002> PMID: 18585915
  13. Thurlow LR, Joshi GS, Richardson AR. Virulence strategies of the dominant USA300 lineage of community-associated methicillin-resistant *Staphylococcus aureus* (CA-MRSA). *FEMS Immunol Med Microbiol.* 2012; 65:5–22. <https://doi.org/10.1111/j.1574-695X.2012.00937.x> PMID: 22309135
  14. Löffler B, Hussain M, Grundmeier M, Brück M, Holzinger D, Varga G, et al. *Staphylococcus aureus* panton-valentine leukocidin is a very potent cytotoxic factor for human neutrophils. *PLoS Pathog.* 2010; 6: e1000715. <https://doi.org/10.1371/journal.ppat.1000715> PMID: 20072612
  15. Nishiyama A, Isobe H, Iwao Y, Takano T, Hung WC, Taneike I, et al. Accumulation of staphylococcal Panton-Valentine leukocidin in the detergent-resistant membrane microdomains on the target cells is essential for its cytotoxicity. *FEMS Immunol Med Microbiol.* 2012; 66:343–352. <https://doi.org/10.1111/j.1574-695X.2012.01027.x> PMID: 22924956
  16. Kaneko J, Kimura T, Narita S, Tomita T, Kamio Y. Complete nucleotide sequence and molecular characterization of the temperate staphylococcal bacteriophage  $\phi$ PVL carrying Panton-Valentine leukocidin genes. *Gene.* 1998; 215:57–67. PMID: 9666077
  17. Yamamoto T, Takano T, Yabe S, Higuchi W, Iwao Y, Isobe H, et al. Super-sticky familial infections caused by Panton-Valentine leukocidin-positive ST22 community-acquired methicillin-resistant *Staphylococcus aureus* in Japan. *J Infect Chemother.* 2012; 18:187–198. <https://doi.org/10.1007/s10156-011-0316-0> PMID: 22160592
  18. Baud O, Giron S, Aumeran C, Mouly D, Bardon G, Besson M, et al. First outbreak of community-acquired MRSA USA300 in France: failure to suppress prolonged MRSA carriage despite decontamination procedures. *Eur J Clin Microbiol Infect Dis.* 2014; 33:1757–1762. <https://doi.org/10.1007/s10096-014-2127-6> PMID: 24816900
  19. Wang R, Braughton KR, Kretschmer D, Bach TH, Queck SY, Li M, et al. Identification of novel cytolytic peptides as key virulence determinants for community-associated MRSA. *Nat Med.* 2007; 13:1510–1514. <https://doi.org/10.1038/nm1656> PMID: 17994102
  20. Sawanobori E, Hung WC, Takano T, Hachuda K, Horiuchi T, Higuchi W, et al. Emergence of Panton-Valentine leukocidin-positive ST59 methicillin-susceptible *Staphylococcus aureus* with high cytolytic peptide expression in association with community-acquired pediatric osteomyelitis complicated by pulmonary embolism. *J Microbiol Immunol Infect.* 2015; 48:565–573. <https://doi.org/10.1016/j.jmii.2014.04.015> PMID: 25070278
  21. Khokhlova OE, Hung WC, Wan TW, Iwao Y, Takano T, Higuchi W, et al. Healthcare- and community-associated methicillin-resistant *Staphylococcus aureus* (MRSA) and fatal pneumonia with pediatric deaths in Krasnoyarsk, Siberian Russia: unique MRSA's multiple virulence factors, genome, and step-wise evolution. *PLoS One.* 2015; 10:e0128017. <https://doi.org/10.1371/journal.pone.0128017> PMID: 26047024
  22. Wan TW, Tomita Y, Saita N, Konno K, Iwao Y, Hung WC, et al. Emerging ST121/*agr4* community-associated methicillin-resistant *Staphylococcus aureus* (MRSA) with strong adhesin and cytolytic activities: trigger for MRSA pneumonia and fatal aspiration pneumonia in an influenza-infected elderly. *New Microbes New Infect.* 2016; 13:17–21. <https://doi.org/10.1016/j.nmni.2016.05.011> PMID: 27358743
  23. Craig NL. A moveable feast: an introduction to mobile DNA. In: Craig NL, Chandler M, Gellert M, Lambowitz AM, Rice PA, Sandmeyer SB, editors. *Mobile DNA III*. Washington, DC: ASM Press; 2014. pp. 3–39.

24. Malachowa N, DeLeo FR. Mobile genetic elements of *Staphylococcus aureus*. *Cell Mol Life Sci*. 2010; 67:3057–3071. <https://doi.org/10.1007/s00018-010-0389-4> PMID: 20668911
25. Novick RP, Christie GE, Penadés JR. The phage-related chromosomal islands of Gram-positive bacteria. *Nat Rev Microbiol*. 2010; 8:541–551. <https://doi.org/10.1038/nrmicro2393> PMID: 20634809
26. Benson MA, Ohneck EA, Ryan C, Alonzo F3rd, Smith H, Narechania A, et al. Evolution of hypervirulence by a MRSA clone through acquisition of a transposable element. *Mol Microbiol*. 2014; 93:664–681. <https://doi.org/10.1111/mmi.12682> PMID: 24962815
27. Xia G, Wolz C. Phages of *Staphylococcus aureus* and their impact on host evolution. *Infect. Genet. Evol*. 2014; 21:593–601 <https://doi.org/10.1016/j.meegid.2013.04.022> PMID: 23660485
28. Siguier P, Goubeyre E, Varani A, Ton-Hoang B, Chandler M. Everyman's guide to bacterial insertion sequences. *Microbiol Spectr*. 2015; 3:MDNA3-0030-2014.
29. Wan TW, Khokhlova OE, Iwao Y, Higuchi W, Hung WC, Reva IV, et al. Complete circular genome sequence of successful ST8/SCC<sub>medV</sub> community-associated methicillin-resistant *Staphylococcus aureus* (OC8) in Russia: one-megabase genomic inversion, IS256's spread, and evolution of Russia ST8-IV. *PLoS One*. 2016; 11:e0164168. <https://doi.org/10.1371/journal.pone.0164168> PMID: 27741255
30. Grindley ND, Whiteson KL, Rice PA. Mechanisms of site-specific recombination. *Annu Rev Biochem*. 2006; 75:567–605. <https://doi.org/10.1146/annurev.biochem.73.011303.073908> PMID: 16756503
31. Takamatsu D, Osaki M, Sekizaki T. Chloramphenicol resistance transposable element TnSs1 of *Streptococcus suis*, a transposon flanked by IS6-family elements. *Plasmid*. 2003; 49:143–151. PMID: 12726767
32. Pasquali F1, Kehrenberg C, Manfreda G, Schwarz S. Physical linkage of Tn3 and part of Tn1721 in a tetracycline and ampicillin resistance plasmid from *Salmonella* Typhimurium. *J Antimicrob Chemother*. 2005; 55:562–565. <https://doi.org/10.1093/jac/dkh553> PMID: 15731203
33. Archer GL, Thanassi JA, Niemeyer DM, Pucci MJ. Characterization of IS1272, an insertion sequence-like element from *Staphylococcus haemolyticus*. *Antimicrob Agents Chemother*. 1996; 40:924–929. PMID: 8849253
34. Bouchami O, de Lencastre H, Miragaia M. Impact of Insertion Sequences and Recombination on the Population Structure of *Staphylococcus haemolyticus*. *PLoS One*. 2016; 11:e0156653. <https://doi.org/10.1371/journal.pone.0156653> PMID: 27249649
35. Holden MT, Feil EJ, Lindsay JA, Peacock SJ, Day NP, Enright MC, et al. Complete genomes of two clinical *Staphylococcus aureus* strains: evidence for the rapid evolution of virulence and drug resistance. *Proc Natl Acad Sci USA*. 2004; 101:9786–9791. <https://doi.org/10.1073/pnas.0402521101> PMID: 15213324
36. Diep BA, Gill SR, Chang RF, Phan TH, Chen JH, Davidson MG, et al. Complete genome sequence of USA300, an epidemic clone of community-acquired methicillin-resistant *Staphylococcus aureus*. *Lancet*. 2006; 367:731–739. [https://doi.org/10.1016/S0140-6736\(06\)68231-7](https://doi.org/10.1016/S0140-6736(06)68231-7) PMID: 16517273
37. Nakagawa S, Taneike I, Mimura D, Iwakura N, Nakayama T, Emura T, et al. Gene sequences and specific detection for Panton-Valentine leukocidin. *Biochem Biophys Res Commun*. 2005; 328:995–1002. <https://doi.org/10.1016/j.bbrc.2005.01.054> PMID: 15707976
38. Takano T, Higuchi W, Zaraket H, Otsuka T, Baranovich T, Enany S, et al. Novel characteristics of community-acquired methicillin-resistant *Staphylococcus aureus* strains belonging to multilocus sequence type 59 in Taiwan. *Antimicrob Agents Chemother*. 2008; 52:837–845. <https://doi.org/10.1128/AAC.01001-07> PMID: 18086843
39. Higuchi W, Yamamoto T. Panton-Valentine leukocidin (PVL)-positive *Staphylococcus aureus*: familial infections and PVL phage mutations (abstract number, P2-209/WS5-6). *Japanese Journal of Bacteriology* (the 80th annual meeting abstracts). 2007; 62:183. (in Japanese)
40. Strommenger B, Kettlitz C, Weniger T, Harmsen D, Friedrich AW, Witte W. Assignment of *Staphylococcus* isolates to groups by *spa* typing, SmaI macrorestriction analysis, and multilocus sequence typing. *J Clin Microbiol*. 2006; 44:2533–2540. <https://doi.org/10.1128/JCM.00420-06> PMID: 16825376
41. Takano T, Hung WC, Shibuya M, Higuchi W, Iwao Y, Nishiyama A, et al. A new local variant (ST764) of the globally disseminated ST5 lineage of hospital-associated methicillin-resistant *Staphylococcus aureus* (MRSA) carrying the virulence determinants of community-associated MRSA. *Antimicrob Agents Chemother*. 2013; 57:1589–1595. <https://doi.org/10.1128/AAC.01147-12> PMID: 23318800
42. Clinical and Laboratory Standards Institute. Performance standard for antimicrobial susceptibility testing. 25th informational supplement M100-S25. Wayne PA: Clinical and Laboratory Standards Institute; 2015.
43. Chin CS, Alexander DH, Marks P, Klammer AA, Drake J, Heiner C, et al. Nonhybrid, finished microbial genome assemblies from long-read SMRT sequencing data. *Nat Methods*. 2013; 10:563–569. <https://doi.org/10.1038/nmeth.2474> PMID: 23644548



44. Jarraud S, Mougel C, Thioulouse J, Lina G, Meugnier H, Forey F, et al. Relationships between *Staphylococcus aureus* genetic background, virulence factors, *agr* groups (alleles), and human disease. *Infect Immun*. 2002; 70:631–641. <https://doi.org/10.1128/IAI.70.2.631-641.2002> PMID: 11796592
45. van Wamel WJ, Rooijackers SH, Ruyken M, van Kessel KP, van Strijp JA. The innate immune modulators staphylococcal complement inhibitor and chemotaxis inhibitory protein of *Staphylococcus aureus* are located on beta-hemolysin-converting bacteriophages. *J Bacteriol*. 2006; 188:1310–1315. <https://doi.org/10.1128/JB.188.4.1310-1315.2006> PMID: 16452413
46. Hung WC, Takano T, Higuchi W, Iwao Y, Khokhlova O, Teng LJ, et al. Comparative genomics of community-acquired ST59 methicillin-resistant *Staphylococcus aureus* in Taiwan: novel mobile resistance structures with IS1216V. *PLoS One*. 2012; 7(10):e46987 <https://doi.org/10.1371/journal.pone.0046987> PMID: 23071689
47. Yamamoto T, Tamura T, Yokota T. Primary structure of heat-labile enterotoxin produced by *Escherichia coli* pathogenic for humans. *J Biol Chem*. 1984; 259:5037–5044. PMID: 6325417
48. Loessner I, Dietrich K, Dittrich D, Hacker J, Ziebuhr W. Transposase-dependent formation of circular IS256 derivatives in *Staphylococcus epidermidis* and *Staphylococcus aureus*. *J Bacteriol*. 2002; 184:4709–4714. <https://doi.org/10.1128/JB.184.17.4709-4714.2002> PMID: 12169594
49. Rasigade JP, Laurent F, Lina G, Meugnier H, Bes M, Vandenesch F, et al. Global distribution and evolution of Pantone-Valentine leukocidin-positive methicillin-susceptible *Staphylococcus aureus*, 1981–2007. *J Infect Dis*. 2010; 201:1589–1597. <https://doi.org/10.1086/652008> PMID: 20367458
50. Rao Q, Shang W, Hu X, Rao X. *Staphylococcus aureus* ST121: a globally disseminated hypervirulent clone. *J Med Microbiol*. 2015; 64:1462–1473. <https://doi.org/10.1099/jmm.0.000185> PMID: 26445995
51. Fraunholz M, Bernhardt J, Schuldes J, Daniel R, Hecker M, Sinha B. Complete genome sequence of *Staphylococcus aureus* 6850, a highly cytotoxic and clinically virulent methicillin-sensitive strain with distant relatedness to prototype strains. *Genome Announc*. 2013; 1:pii: e00775-13.
52. de Bentzmann S, Tristan A, Etienne J, Brousse N, Vandenesch F, Lina G. *Staphylococcus aureus* isolates associated with necrotizing pneumonia bind to basement membrane type I and IV collagens and laminin. *J Infect Dis*. 2004; 190:1506–1515. <https://doi.org/10.1086/424521> PMID: 15378445
53. Zong Y, Xu Y, Liang X, Keene DR, Höök A, Gurusiddappa S, et al. A 'Collagen Hug' model for *Staphylococcus aureus* CNA binding to collagen. *EMBO J*. 2005; 24:4224–4236. <https://doi.org/10.1038/sj.emboj.7600888> PMID: 16362049
54. McGuinness WA, Kobayashi SD, DeLeo FR. Evasion of neutrophil killing by *Staphylococcus aureus*. *Pathogens*. 2016; 5:pii: E32.
55. Curcio MJ, Derbyshire KM. The outs and ins of transposition: from mu to kangaroo. *Nat Rev Mol Cell Biol*. 2003; 4:865–877. <https://doi.org/10.1038/nrm1241> PMID: 14682279
56. Ziebuhr W, Krimmer V, Rachid S, Lössner I, Götz F, Hacker J. A novel mechanism of phase variation of virulence in *Staphylococcus epidermidis*: evidence for control of the polysaccharide intercellular adhesion synthesis by alternating insertion and excision of the insertion sequence element IS256. *Mol Microbiol*. 1999; 32:345–356 PMID: 10231490
57. Furi L, Haigh R, Al Jabri ZJ, Morrissey I, Ou HY, León-Sampedro R, et al. Dissemination of novel antimicrobial resistance mechanisms through the insertion sequence mediated spread of metabolic genes. *Front Microbiol*. 2016; 7:1008. <https://doi.org/10.3389/fmicb.2016.01008> PMID: 27446047
58. Berlon NR, Qi R, Sharma-Kuinkel BK, Joo HS, Park LP, George D, et al. Clinical MRSA isolates from skin and soft tissue infections show increased in vitro production of phenol soluble modulins. *J Infect*. 2015; 71:447–457. <https://doi.org/10.1016/j.jinf.2015.06.005> PMID: 26079275
59. Qi R, Joo HS, Sharma-Kuinkel B, Berlon NR, Park L, Fu CL, et al. Increased in vitro phenol-soluble modulin production is associated with soft tissue infection source in clinical isolates of methicillin-susceptible *Staphylococcus aureus*. *J Infect*. 2016 Mar; 72(3):302–308. <https://doi.org/10.1016/j.jinf.2015.11.002> PMID: 26778460
